# Supplementary material for: Genome-wide identification and characterization of pectin methylesterase inhibitor gene family members related to abiotic stresses in watermelon
Source: Front Plant Sci. 2024 Sep 17;15:1454046. doi: 10.3389/fpls.2024.1454046 (PMC11442291; doi:10.3389/fpls.2024.1454046)
Supplement: Supplementary file 2 [file Table1.xlsx]

## Sheet: Table S1
Gene Name	Gene ID	CDS sequenc	Genomic sequences	Protein sequence
ClPMEI1	Cla97C01G000480.1	ATGATCAACAACAACTACAACAAGCTTCACTCCTCCCGCTCCCTCGACTCTACTCCCGCCACCTCCTTCCACCTTTCCCCCAATGATCCTCCGCCACCTCCACCCTCCTCCTCCCTCCGCCGCCGCTCTCGTATCCTTATCATCTCCTTCCTCTCCGTCCTCCTCATCGCTGCCTCCGTGGTCTCCGCCGCCATGCTCGTCCGGTCCCATATCGCATCGAGCCAACCCAATTTCCCTCACAACAAGCCGTCCCAAGCCATCTCCCGAGCCTGCAGCCACACTCTGTACCCATCTCTCTGCCTCTCTTCTCTTCTCTCCTTCCCCGGCTCTCTCTCCGCCGACGTCCATGACCTTGTTCACATCTCTCTCAACTTAACTCTTCAACATCTCACCAAAGCT…	ATGATCAACAACAACTACAACAAGCTTCACTCCTCCCGCTCCCTCGACTCTACTCCCGCCACCTCCTTCCACCTTTCCCCCAATGATCCTCCGCCACCTCCACCCTCCTCCTCCCTCCGCCGCCGCTCTCGTATCCTTATCATCTCCTTCCTCTCCGTCCTCCTCATCGCTGCCTCCGTGGTCTCCGCCGCCATGCTCGTCCGGTCCCATATCGCATCGAGCCAACCCAATTTCCCTCACAACAAGCCGTCCCAAGCCATCTCCCGAGCCTGCAGCCACACTCTGTACCCATCTCTCTGCCTCTCTTCTCTTCTCTCCTTCCCCGGCTCTCTCTCCGCCGACGTCCATGACCTTGTTCACATCTCTCTCAACTTAACTCTTCAACATCTCACCAAAGCT…	MLSPPSKFAMPNLKISLPILIILVALHNAATAESSAATSFIETSCRVTRYPALCVQSLSSYATTIRQSGRQLARMALSVSLSKARLAAAFVAKLGKGGGMKGLEYQAVKDCIENMGDSVDRLSQSVKELGDLRRTAGGDFLWHMNNVQTWVSAALTDETTCLDGFAGHRLDGKVKATIRRRITLVAQITSNALALVNRFADRNH
ClPMEI2	Cla97C01G003880.1	ATGCTTTCTCCTCCCTCTAAATTTGCAATGCCAAATCTCAAGATCTCACTACCAATTCTCATTATCCTTGTAGCTCTCCACAATGCGGCAACAGCAGAGTCGTCGGCGGCGACAAGCTTCATCGAGACATCCTGCAGAGTGACCCGCTACCCGGCGCTGTGCGTTCAGTCCTTGTCAAGCTACGCCACCACCATCCGCCAGAGCGGTCGTCAGCTGGCCCGAATGGCCCTGTCCGTGAGCCTCAGCAAGGCCCGTCTCGCAGCAGCCTTCGTGGCCAAACTGGGCAAAGGCGGTGGAATGAAGGGGCTGGAGTACCAAGCAGTGAAGGACTGCATAGAGAATATGGGGGACAGCGTGGACAGGCTCAGCCAATCGGTGAAGGAGCTTGGGGACTTACGT…	ATGCTTTCTCCTCCCTCTAAATTTGCAATGCCAAATCTCAAGATCTCACTACCAATTCTCATTATCCTTGTAGCTCTCCACAATGCGGCAACAGCAGAGTCGTCGGCGGCGACAAGCTTCATCGAGACATCCTGCAGAGTGACCCGCTACCCGGCGCTGTGCGTTCAGTCCTTGTCAAGCTACGCCACCACCATCCGCCAGAGCGGTCGTCAGCTGGCCCGAATGGCCCTGTCCGTGAGCCTCAGCAAGGCCCGTCTCGCAGCAGCCTTCGTGGCCAAACTGGGCAAAGGCGGTGGAATGAAGGGGCTGGAGTACCAAGCAGTGAAGGACTGCATAGAGAATATGGGGGACAGCGTGGACAGGCTCAGCCAATCGGTGAAGGAGCTTGGGGACTTACGT…	MKPQRPLILSLLFASTLFLLRPVPTAAADDSGLSANATSNCTQFIRSSCSITLYPDVCYTSLSRYANAIQQDPASLTRVAITISLANSRRMAAYVSNLSHVGDYGADRRAASALHDCFTNFDDAVDEIRGSLKQMRQINDVDAPSFRFQMSNVQTWMSAALTDQETCTDGFEDVADGPMKVDVCAKAEKVKKHTSNALALVNSFVEKRIP
ClPMEI3	Cla97C01G003890.1	ATGGAGAATTCCCATTTTCCTTCCTTCCAAACACTCCCCATATTCCTTCTCTTCCTTCTCCTCATCATTTCCGATCAAACCCAAATCTTCTCCGCCGCCTCAAGAATCCCCAAATCCCCTGCCGGAATCAGAACAAATACAGAGTATGTCAGAACCTCCTGCAGTACTACTTCATACCCTCGCCTCTGTTACAATTCGCTGTCGGTGTACGCCGGCAAGATCAAGACCAACCCCAAGACGCTGGCTCTCGCCGCCCTCCATGTCAACCTCGCCGCCGCTCGATCCTCAGCGGCATCAATGAGAAGGTTGGCGAAAACCCACGGCCTGCGGCGGAGAGAGGCGTCGGCGATCTCCGATTGCGTGGAGGAGGTTGGGGATTCGGTTTTTGAGCTTCAGAGA…	ATGGAGAATTCCCATTTTCCTTCCTTCCAAACACTCCCCATATTCCTTCTCTTCCTTCTCCTCATCATTTCCGATCAAACCCAAATCTTCTCCGCCGCCTCAAGAATCCCCAAATCCCCTGCCGGAATCAGAACAAATACAGAGTATGTCAGAACCTCCTGCAGTACTACTTCATACCCTCGCCTCTGTTACAATTCGCTGTCGGTGTACGCCGGCAAGATCAAGACCAACCCCAAGACGCTGGCTCTCGCCGCCCTCCATGTCAACCTCGCCGCCGCTCGATCCTCAGCGGCATCAATGAGAAGGTTGGCGAAAACCCACGGCCTGCGGCGGAGAGAGGCGTCGGCGATCTCCGATTGCGTGGAGGAGGTTGGGGATTCGGTTTTTGAGCTTCAGAGA…	MESSYLPLPLPITAILLIILINQPNIAKSQPVNDTQFIKSTCQSTPYPDLCLSSLSADATAIHGSHRLMTIAALTVALTHTRSASSAVERLAKSSGLTPRESYVLRDCIEEFGDSIEELKMAVAELKDNDKTRFETKDIRTWVSAALTDDDTCMDGFAGDAMNGNVKESVRTLVVDVAQLTSNALSLVSLLK
ClPMEI4	Cla97C01G004980.1	ATGGAGAGAGCTATAATAGCCGAAACACTCACAAAAGAGTTAGGCCAGAAATGCCGTAACCAAAAAGAGAGAGCCGCTTGGGCTGACTGTTTGGAGCTTTACCAAACCACAATCCTCCACCTCAACAAAACCTTCTCCGAACAAAATTGCTCCGACTTCGACATCCAAACATGGCTCAGCTCCGCCTTGACCAACCTCGACACATGTCGTGCCGGGTTCGTCGACCTCGGCGTCAAGGATTACGGCGTTGTTTTCCCTTTTTTGGCAAATAACAACGTCACGAAGCTTATAAGTAATAGTTTGGCGATGAATAACTGCTCCGAGAGTGATGTGGGGTATAAGAATAATGAAGGGTTTCCGAAGTGGCTTCGGGTTGGAGACCGTCGGTTGTTGCAGGCG…	ATGGAGAGAGCTATAATAGCCGAAACACTCACAAAAGAGTTAGGCCAGAAATGCCGTAACCAAAAAGAGAGAGCCGCTTGGGCTGACTGTTTGGAGCTTTACCAAACCACAATCCTCCACCTCAACAAAACCTTCTCCGAACAAAATTGCTCCGACTTCGACATCCAAACATGGCTCAGCTCCGCCTTGACCAACCTCGACACATGTCGTGCCGGGTTCGTCGACCTCGGCGTCAAGGATTACGGCGTTGTTTTCCCTTTTTTGGCAAATAACAACGTCACGAAGCTTATAAGTAATAGTTTGGCGATGAATAACTGCTCCGAGAGTGATGTGGGGTATAAGAATAATGAAGGGTTTCCGAAGTGGCTTCGGGTTGGAGACCGTCGGTTGTTGCAGGCG…	MCMNPRDPYANTLIYTIFHLFINTKPISPLSLHHFPFFLNSIHLQKTKTEMGFSNSKKIFIIFQLILQLTFIHSAITPQSSTEFIKTSCSSATYPRLCFSSLSVHANAIQTSPRLLATAALSVSLSSVKSAATQILKLSHSHGLPSRDVAALNDCLEELRDSVDSLAASISEMPKLRRGRDFDLVMSNVQTWVSAALTDETTCSDGFQGKAVNGGVKAAVRARIVNIAQLTSNALSLINRIGELH
ClPMEI5	Cla97C01G006690.1	ATGTCTTGCTCCCAAACCCCTTATCCAGACCTCTGCTTCCATTACATAAACTCGAACAACCACGCATCGACTGCCGGTATTGGTGAAACTTCTCTCATCGTCACTGATCACTTTCAAAACTCAGCCATTCGATCCACTTTGAACCAAGCCATGATTGTCCATGACCATCTTCGCTCCGCCATGGTTCTTGATTCATTTGATGACGACGACAGAACTAAATTCGCTTTAATCGATTGTTTGGAACTCTATGAGGATTCGATCGCCGAGCTCAATCATTCGGCAATCAGTTTCATGAATATCAATTCGATTGACCACTTGACGTTGTTAAGTGCTTCATTAGCGAACCATCAAACATGTCAAGATGGATTTCGAGATTTTGGATTTTCGTCTGATGATTTG…	ATGTCTTGCTCCCAAACCCCTTATCCAGACCTCTGCTTCCATTACATAAACTCGAACAACCACGCATCGACTGCCGGTATTGGTGAAACTTCTCTCATCGTCACTGATCACTTTCAAAACTCAGCCATTCGATCCACTTTGAACCAAGCCATGATTGTCCATGACCATCTTCGCTCCGCCATGGTTCTTGATTCATTTGATGACGACGACAGAACTAAATTCGCTTTAATCGATTGTTTGGAACTCTATGAGGATTCGATCGCCGAGCTCAATCATTCGGCAATCAGTTTCATGAATATCAATTCGATTGACCACTTGACGTTGTTAAGTGCTTCATTAGCGAACCATCAAACATGTCAAGATGGATTTCGAGATTTTGGATTTTCGTCTGATGATTTG…	MTFHSLRLLLLLSLCLSAAAHDGAAVSQDLIRSSCLQASYPNLCVRTLSSYGGAVNTSQDLAQAAISVSLSLARDLSRYLSDARRQASRRQRAAVNDCVDQIGDSVEELSNTLSVLRHLPCGSDRRAFRLQMGNAKTWVSAALTNEYTCLDGFKEVEGEVKLDVKKRISKVAKVTSNALFFINRLDGGNPAGRKKLAAP
ClPMEI6	Cla97C01G006700.1	ATGAAACCCCAACGGCCTCTTATCCTCTCTCTCCTATTCGCATCCACTCTCTTCCTCCTCCGCCCGGTTCCCACCGCCGCAGCCGACGATTCCGGATTATCCGCCAACGCCACCTCCAATTGTACCCAGTTCATCCGCAGTAGCTGCAGCATTACTCTCTATCCGGACGTCTGCTACACTTCGCTCTCTCGCTACGCCAACGCCATTCAACAGGACCCCGCCTCGCTCACTCGCGTCGCCATTACCATCAGCCTCGCCAACTCCCGTAGAATGGCCGCTTATGTGTCCAATTTATCTCACGTCGGCGACTATGGCGCCGACCGTAGAGCCGCGTCCGCGCTTCACGACTGTTTCACGAACTTCGACGACGCCGTGGACGAGATTCGTGGCTCGCTCAAG…	ATGAAACCCCAACGGCCTCTTATCCTCTCTCTCCTATTCGCATCCACTCTCTTCCTCCTCCGCCCGGTTCCCACCGCCGCAGCCGACGATTCCGGATTATCCGCCAACGCCACCTCCAATTGTACCCAGTTCATCCGCAGTAGCTGCAGCATTACTCTCTATCCGGACGTCTGCTACACTTCGCTCTCTCGCTACGCCAACGCCATTCAACAGGACCCCGCCTCGCTCACTCGCGTCGCCATTACCATCAGCCTCGCCAACTCCCGTAGAATGGCCGCTTATGTGTCCAATTTATCTCACGTCGGCGACTATGGCGCCGACCGTAGAGCCGCGTCCGCGCTTCACGACTGTTTCACGAACTTCGACGACGCCGTGGACGAGATTCGTGGCTCGCTCAAG…	MGYGRLHKTDPGGTSSSAAAFQLPDQPLSFTPPNPRRTRLFLISLLSLLLIVAAAVSATFLIGLRTASPARSDPNLPRKPTQAISKACGRTRFPTLCVNSLLDFPGSLNANEQDLVHISFNITLQHLNKALYLSSEISSLQMDLRVRSAYDACLELLDDSVDALTRSLQSVAPSSSSGTPQRLGSSEDVITWLSAALTNQDTCTDGFSELSGSVKNQMADKLHNLSELVSNCLALFSGSETSDFSGVPIQNKRRLMNAGHDEDNSGKFPGWMSRRERRLLTLPVGALQADIVVSQNGSGTVKTIAEAIKKAPQYSNRRTIIYVMAGRYEEKNLKVGRKKTNLMFVGDGKGKTVISGAKSVFDNVTTFHTASFAATGAGIILRDMTFENWAGPGRHQAVA…
ClPMEI7	Cla97C01G007540.1	ATGGTGGGGAAGGTGGTCTTGTCGGGAATATCCCTTATTCTTGTAGTTGGTGTAGCTTTGGCTGTGGTCGCTGTAGTTAACAAAAGCAATAGTTCTGATGCAGCGGCAGAGGATTTATCCCCAAAAATGAAAGCTGTCTCATCCATTTGTTCTACTACTGATTACCATCAAGAATGTCAAAATACACTTACCCATGTTGCTCAAAATTCGTCTATAGATGATCCAAAAGAGTATGTTAAAGCCGCAGTTCTTGCAACTATGGAAGAGATTAAAAAGGGTTATAACTTAACTGATAACCTTATGATTGAGGCTGCTAACAATGCCACTATCAAAATGAGTGTTGATGATTGTAAGGACTTGTTGCAATTCGCTATTGATGAGTTGCAAGCATCTTACACA…	ATGGTGGGGAAGGTGGTCTTGTCGGGAATATCCCTTATTCTTGTAGTTGGTGTAGCTTTGGCTGTGGTCGCTGTAGTTAACAAAAGCAATAGTTCTGATGCAGCGGCAGAGGATTTATCCCCAAAAATGAAAGCTGTCTCATCCATTTGTTCTACTACTGATTACCATCAAGAATGTCAAAATACACTTACCCATGTTGCTCAAAATTCGTCTATAGATGATCCAAAAGAGTATGTTAAAGCCGCAGTTCTTGCAACTATGGAAGAGATTAAAAAGGGTTATAACTTAACTGATAACCTTATGATTGAGGCTGCTAACAATGCCACTATCAAAATGAGTGTTGATGATTGTAAGGACTTGTTGCAATTCGCTATTGATGAGTTGCAAGCATCTTACACA…	MLRGPSTRASIATIFALIAILPWLTHCAKTSYVQEACSVTRHQDLCIQSLSPFSSTAKRSPTKWARAGVSVTITEAKTVARFLGRLKKNKRLKGRNRAAVSDCVEVFEAAIDELHLSLGVLRRLSRSNFDAQMGDLTTWVSAALTDEDTCVDGFEGERGKLVNSIRNRVVKAGYITSNALALVNKLAASGFETAPNQ
ClPMEI8	Cla97C01G007550.1	ATGGTGAATAAGGTGGTCTTGTCGGGAATATCCCTTATTCTTGTTGTTGGTGTAGCACTTGCTGTTGTTGCAGTGGTTAACAATAACAAAAATTCTGATGCTTCAACAGAGAATCTTTCCCCAAAAATGAAGGCAGTTTCAACCATTTGTTCTACTACTAATTACCAACAAGAATGTCAAAATACACTTAGCAATGTTGCTCATAATTCCTCTTCCGATGATCCAAAAGAGTATGTTAAAGCCGCAATTCTTGCAACTATTGACGAGGTTAAAAAGGGGTACAACTTGACTGATGGCTTTATGATTGAGGCTGCTAACAATGCCAGCATCAAAATGGGTGTTGAGGATTGCAAGGATTTGTTGCAATTCGCCATTGCCCAGTTGCAGGCATCTTACTCC…	ATGGTGAATAAGGTGGTCTTGTCGGGAATATCCCTTATTCTTGTTGTTGGTGTAGCACTTGCTGTTGTTGCAGTGGTTAACAATAACAAAAATTCTGATGCTTCAACAGAGAATCTTTCCCCAAAAATGAAGGCAGTTTCAACCATTTGTTCTACTACTAATTACCAACAAGAATGTCAAAATACACTTAGCAATGTTGCTCATAATTCCTCTTCCGATGATCCAAAAGAGTATGTTAAAGCCGCAATTCTTGCAACTATTGACGAGGTTAAAAAGGGGTACAACTTGACTGATGGCTTTATGATTGAGGCTGCTAACAATGCCAGCATCAAAATGGGTGTTGAGGATTGCAAGGATTTGTTGCAATTCGCCATTGCCCAGTTGCAGGCATCTTACTCC…	MINNNYNKLHSSRSLDSTPATSFHLSPNDPPPPPPSSSLRRRSRILIISFLSVLLIAASVVSAAMLVRSHIASSQPNFPHNKPSQAISRACSHTLYPSLCLSSLLSFPGSLSADVHDLVHISLNLTLQHLTKALYSTSQIPISQISNDPLAHSAYEDCMELLNDAVDAFSLSLFSTEASNHDVMTWLSAALTYHDTCTDGFADVADLAVKDQVEAKLSDLSEMISNSLAIFSGFGGGDLPVENRRRRRLMESGTQPWAAENGGDGGFPQWVSGKDRRLLATPISAIQADIVVAKDGSGKFKTVAEAIDAAPSSSGRRIVIYIKAGKYEEENLKVGRKKTNLMFVGDGKGITVISGGKSIFDKVTTFRTATFAGSGTGIILRDMTFENTAGASKHQAVAL…
ClPMEI9	Cla97C01G007560.1	ATGGTCAGAAAGGTGGTCGTGTCGGGAATATCCCTTATTCTTGTCGTCGGTGTAGCTCTGGCCGTTGTCGCCATGGTACACAAAAGCAATAGTTCTAATGCTGCAATGGAGGATATGTCCCCAAAGATGAAGGCAATCTCAACCATTTGTTCTACTACGGATTATCAACAAGAATGCAAAAATACACTTAGCAAAATTGCTCATAATGCCTCTTCAAATGACCCAAAAGACTATGTTAGAGCGGCAGTTCTTGCCACTATTGAAGAGATTACAAAGGGCTACAACTTGTCTGATAGCCTTATGGTGGAGGCTGCTAACAATGCCACCATCAAAATGAGTGTTGAAGATTGCAAGGATTTATTGCAGTTCGCCATTGATGAGTTGCATGCATCTTACTCC…	ATGGTCAGAAAGGTGGTCGTGTCGGGAATATCCCTTATTCTTGTCGTCGGTGTAGCTCTGGCCGTTGTCGCCATGGTACACAAAAGCAATAGTTCTAATGCTGCAATGGAGGATATGTCCCCAAAGATGAAGGCAATCTCAACCATTTGTTCTACTACGGATTATCAACAAGAATGCAAAAATACACTTAGCAAAATTGCTCATAATGCCTCTTCAAATGACCCAAAAGACTATGTTAGAGCGGCAGTTCTTGCCACTATTGAAGAGATTACAAAGGGCTACAACTTGTCTGATAGCCTTATGGTGGAGGCTGCTAACAATGCCACCATCAAAATGAGTGTTGAAGATTGCAAGGATTTATTGCAGTTCGCCATTGATGAGTTGCATGCATCTTACTCC…	MENSHFPSFQTLPIFLLFLLLIISDQTQIFSAASRIPKSPAGIRTNTEYVRTSCSTTSYPRLCYNSLSVYAGKIKTNPKTLALAALHVNLAAARSSAASMRRLAKTHGLRRREASAISDCVEEVGDSVFELQRAIRELGRPRGYDFGGLISDIETWVSSALTDEETCMEGFGGRAVNGFSVKAKVRRHIVRVAHLTSNSLALINSYASSAAAEEGVLP
ClPMEI10	Cla97C01G021790.1	ATGGCTACCCATCAGCCACTTCTTCTTCAACCCCCCAAAACTCCCCGATCCAAAACCTTCCCAACAATCCTCTGTTTGGCTGCTCTTTTGTGCTCAGCCATTTTCATTACCAACAAATTCATCAAATCAAACCCATCTAAAAATGATCTACCCTTCCTTCACAACATATGCCACAAGGCATACAACCCATCATCCTGCATTCAAATGGCCGCCTCAGAATCTCCCTTTCCTCAAGAAATCAAAACCACGAACGGGGCTCATTTCTTACATTCTTTCTTGAGGAAATCCATTCCCAAAGTAATTAACACAATCGAGAAAGCCATAGATCTCAGCCAAAGAATCAACAACCCTCGCGGTGAAGCAGCTTTAGCCGATTGTGTCGAGCTTATGGAGATCTCA…	ATGGCTACCCATCAGCCACTTCTTCTTCAACCCCCCAAAACTCCCCGATCCAAAACCTTCCCAACAATCCTCTGTTTGGCTGCTCTTTTGTGCTCAGCCATTTTCATTACCAACAAATTCATCAAATCAAACCCATCTAAAAATGATCTACCCTTCCTTCACAACATATGCCACAAGGCATACAACCCATCATCCTGCATTCAAATGGCCGCCTCAGAATCTCCCTTTCCTCAAGAAATCAAAACCACGAACGGGGCTCATTTCTTACATTCTTTCTTGAGGAAATCCATTCCCAAAGTAATTAACACAATCGAGAAAGCCATAGATCTCAGCCAAAGAATCAACAACCCTCGCGGTGAAGCAGCTTTAGCCGATTGTGTCGAGCTTATGGAGATCTCA…	MKPISIVITVLVVSVCQFQILAQTPQTPQTPQTPQTATVPGGNDLITKTCSSTHYNEMCRTILQSSPNSNGADLYGLAQIVMNIASENVSNIYESINQLQNGTSVDSFLDDCLTDCLESYQDAIDQIEDSVTALEFKAYNDVKTWVAAAMSDAATCDMGFKEKPGYESPIAQMTAVFDQICNIILTITQQLSDGKST
ClPMEI11	Cla97C02G026840.1	ATGAAACTCAAACCCGCCATTATCTTTCTCTCTTCATTTCCAATGCCTTCCCTTCTCTTTCTCTTCTTCCTCCCTCTACATTTCTCTTACGCCGCCCACCAAACTCTCCGCCCTGAGATCGCTGCCGCCTGCACTGCCACTCGCTTCCCGGACCAATGCGCATCCTCCATCTCCCAATCCAACCGTCTTCCCCAGAATCCCACGCCGCTGCAGATTATTCAGGCCGCCGTCTGGCTCTCCTCGGAGAATCTCAAAACTGCCAAATCCATGGTGAAGGCCATTCTCGATTCCTCCAAGGAGAGCCCCAACCGCAACCGCACCGCCGCGGCGCTGAGCTGCCTGGAGGCGCTGGGTTACTCCGAGTACCGAATTTCGCTTTCCAACGACGCCATTCCGCTC…	ATGAAACTCAAACCCGCCATTATCTTTCTCTCTTCATTTCCAATGCCTTCCCTTCTCTTTCTCTTCTTCCTCCCTCTACATTTCTCTTACGCCGCCCACCAAACTCTCCGCCCTGAGATCGCTGCCGCCTGCACTGCCACTCGCTTCCCGGACCAATGCGCATCCTCCATCTCCCAATCCAACCGTCTTCCCCAGAATCCCACGCCGCTGCAGATTATTCAGGCCGCCGTCTGGCTCTCCTCGGAGAATCTCAAAACTGCCAAATCCATGGTGAAGGCCATTCTCGATTCCTCCAAGGAGAGCCCCAACCGCAACCGCACCGCCGCGGCGCTGAGCTGCCTGGAGGCGCTGGGTTACTCCGAGTACCGAATTTCGCTTTCCAACGACGCCATTCCGCTC…	MESQILKSLQTLFFFIILTTFTTSAVACSSSTVRKTCKPTPYPRLCETALSLYASQTKRNQQELCRAAMVSSLKAAQNATSIVSKLSRKKVSPYEAQVLRDCIDNLNDSVDELRQAIAAIKSLSPRSNDVEFQLSSIKTWMSAAETDVITCTDGLSGGAGRKVSQKVKKEVKNCSVNVVRQISNALSLVNNFNFK
ClPMEI12	Cla97C02G026860.1	ATGCTCCCCAGAAAACCCCCATTCCCTTTCCCCATTTCCAAATCCACTCTCCTTTTCCTCTCCATGGCTTCCCTCTCCTTCCTCTCTTTCCTCTCCCTCTTCTTCTTCTTCCTCTCTCTCTCCTCCTCCTCCGCCGCCGCTCGCCATCGCCACCACCACCTCCCAACCCATTTCACCAACCCCCCTTCCACCGACGACGTCATCCTTCACGCCTGCAAGGCCACCCGTTTTCCCGATCAATGCGGATCTTCCCTCTCTCACTCCTCCTCTCTCCCTCCCAATCCTACCCCTCTCCAGATCCTCCAATCCGCCGTCGCCCTCTCATCCGACGGTTTAGCCACTGCTCAATCCATGGTTAACCAGATTCTCGATTCCTCCGCCAAGAATCTCAATCGGACC…	ATGCTCCCCAGAAAACCCCCATTCCCTTTCCCCATTTCCAAATCCACTCTCCTTTTCCTCTCCATGGCTTCCCTCTCCTTCCTCTCTTTCCTCTCCCTCTTCTTCTTCTTCCTCTCTCTCTCCTCCTCCTCCGCCGCCGCTCGCCATCGCCACCACCACCTCCCAACCCATTTCACCAACCCCCCTTCCACCGACGACGTCATCCTTCACGCCTGCAAGGCCACCCGTTTTCCCGATCAATGCGGATCTTCCCTCTCTCACTCCTCCTCTCTCCCTCCCAATCCTACCCCTCTCCAGATCCTCCAATCCGCCGTCGCCCTCTCATCCGACGGTTTAGCCACTGCTCAATCCATGGTTAACCAGATTCTCGATTCCTCCGCCAAGAATCTCAATCGGACC…	MMISTSFLFSFTTFLLLIFSSSHGLNTQNIIQETCKKSAESSPNINYKFCVASLESDSRSRSANLHKLGLISMDLLRHNITSTRREIKKLLRNKKLENFVKGCLKDCLELYSDAIPTLKEVKREYKEKNYRDANVKVSSIMEAPTTCEDGFQEKQGTISPLTNNNNNVFQLAALTLSIINMNMHLQ
ClPMEI13	Cla97C02G027500.1	ATGGCTTCTTCAAATCCCATCTCTCTTCTCACATTTCTCACTTTCCTCTTCCTCCTCTCTTCTTCATCTTCTGCTGTAGTTCCAACCGCAGAGATTTGCCAATCCACCGCCTCCCCGTCCTTCTGCAACTCTTTCCTTCCCAACTCCGCGGCCTCGGTCCACTCCCATTGTCGCTTCACTCTCCGCAATGCCCTCGACCATGCACATGCCTTCTTGGCACTCGTCGACTCTCACCTCAGCCTTTTCCCCTCCCTCTCCGCCCTCCACGACTGCCGTGGCCTCGCGGAAGCCAACCTCGACTTTATATCCCAAACTTTTTCCATAGTCAACTCCACAGCCATGGTCCTTCCTTATTACCAAGCCCATGAGATGGTGTCCTTAATGAGTGCAATGATCACC…	ATGGCTTCTTCAAATCCCATCTCTCTTCTCACATTTCTCACTTTCCTCTTCCTCCTCTCTTCTTCATCTTCTGCTGTAGTTCCAACCGCAGAGATTTGCCAATCCACCGCCTCCCCGTCCTTCTGCAACTCTTTCCTTCCCAACTCCGCGGCCTCGGTCCACTCCCATTGTCGCTTCACTCTCCGCAATGCCCTCGACCATGCACATGCCTTCTTGGCACTCGTCGACTCTCACCTCAGCCTTTTCCCCTCCCTCTCCGCCCTCCACGACTGCCGTGGCCTCGCGGAAGCCAACCTCGACTTTATATCCCAAACTTTTTCCATAGTCAACTCCACAGCCATGGTCCTTCCTTATTACCAAGCCCATGAGATGGTGTCCTTAATGAGTGCAATGATCACC…	MKPKFSLSPFMITPLPSLLLLSIIIFNISTTIVVADLVQKTCKKCENNDPNINYNFCISSFHAHPGSDTADLRKLGAISLSLIQKNVSNSFEYVEKLLQNKEIDSYKKLCLNDCLEVYSNAIDSMEEGKKAYKEKHYNDANIKVSSVMDAARVCEDGFREKEGVSSPLTKWNKDLFQLAAIALSIINMYP
ClPMEI14	Cla97C02G040540.1	ATGAATTGCTATCAAAATCTTACCTCTTTCATCCCTGCTCTTCTTTTGGCAGCTTTTTTCCTAACCATTGTCCCTTCTCATGGAATCCCCCGTGAAAATCTGGTCACCATTTGCTCTAAAACCTCCAATCTGTCGCTCTGCCAGAAAATACTCAGTAACGATTCTCGTACCATGTCGGCCGACCTTCCTATGCTCTCGCTTATATCCAGCAATCTGACAAAGAAACAAGCAAATCAAAACCTTGATTCCTTCTCCAAACTAAGTAAGAATGAGAGTGATCCTGAGCAGAAGAGAAGTTTCGAGCGTTGTGTGAAGTATTACCGTGAAATTCAAGCAAATATTCAAAAGGCTCATCAGTTCTCACAGCAGAAGATTTTCAGAGACAATGGTCCATTGGTA…	ATGAATTGCTATCAAAATCTTACCTCTTTCATCCCTGCTCTTCTTTTGGCAGCTTTTTTCCTAACCATTGTCCCTTCTCATGGAATCCCCCGTGAAAATCTGGTCACCATTTGCTCTAAAACCTCCAATCTGTCGCTCTGCCAGAAAATACTCAGTAACGATTCTCGTACCATGTCGGCCGACCTTCCTATGCTCTCGCTTATATCCAGCAATCTGACAAAGAAACAAGCAAATCAAAACCTTGATTCCTTCTCCAAACTAAGTAAGAATGAGAGTGATCCTGAGCAGAAGAGAAGTTTCGAGCGTTGTGTGAAGTATTACCGTGAAATTCAAGCAAATATTCAAAAGGCTCATCAGTTCTCACAGCAGAAGATTTTCAGAGACAATGGTCCATTGGTA…	MKETDIMEKPIAAGLSNSGNHHQKPKNKSKKLLILALSSTLLLVGAVVGIVAGVTKSENSGKSHAIVKSTCSSTLYPDLCFSAISNSEGAMLKVSNQKDVIEVSINITVKAVEDNYFRVKKLCGLKNISHREKIALHDCLETIDETLDELHKAIVDLHQYPNKKSLNQHADDLKTLLSSAITNQETCLDGFSHDEADKNLRDKLKEGQEEVEHMCSNALAMIKNMTDTDIANYEAKMGTTNNRKLKEEQNNGDGIQWPEWLSAGDRRLLQSSSVEPDVVVAADGSGNFRTVAAAVAAAPEKSSKRYVIRIKAGVYRENVEVPKKKTNIMFMGDGRRNTIITGSRNVVDGSTTFNSATVAAVGGGFLARDITFQNTAGPSKHQAVALRVGADLSAFYQCD…
ClPMEI15	Cla97C02G040550.1	ATGGCTTCTTCAACATGTTTTCTATCTTCTCAGTTATGGCTTACCTTGTTCGTCGTCTTCGTCGTTTCTCGATCGACAATGGCAGCTGACAGTGAAACTGAAGATAAAATCAACACATTGTGTCGTCAAATGGAAGAATTTGGGTTTTGCAGCCAAACATTCCATGAGAATTTGAAAGGTGCTTCAACAGATTATATAGGGCTGACTAAAATAGCCAATAATCGAGCCATTATCAATGCAACCAATACACTTGGGTACATTGAAGAGCTTTTGAAAAGTGAAAGTGACCCAGCAATGAAGAATGACTTGACAGTATGCGAAAATGCATATAAGATAGTGAATGAAGCATTTGGTGAAGGGATGAAGTTGTTCTCACAAGGAGATTATAAAGGAATGTTG…	ATGGCTTCTTCAACATGTTTTCTATCTTCTCAGTTATGGCTTACCTTGTTCGTCGTCTTCGTCGTTTCTCGATCGACAATGGCAGCTGACAGTGAAACTGAAGATAAAATCAACACATTGTGTCGTCAAATGGAAGAATTTGGGTTTTGCAGCCAAACATTCCATGAGAATTTGAAAGGTGCTTCAACAGATTATATAGGGCTGACTAAAATAGCCAATAATCGAGCCATTATCAATGCAACCAATACACTTGGGTATGTAATTTGTTGCATAAATACTACTAAAATGTGTGTATGTAATTATTAATAACTCCGTTTTATAACCCTTTCGTTTTCAGTTTTTGTTTTTAAAAATTAAGCTTATAAACATTACTTTTACCTTCAAATTTATTCCTTTACT…	MSNGFANGEGDKKKKKIAIVSVSSLILVAMVVAVTVGVNSAPHEEHSDDHGGETHEISSTTKAIQAICQPTDYKESCEKSLMAEAGNTTDPKELVKVGFKIATRNLNEAIRNSTTLQELAKDPRTNQALQNCRELLEYAIDDLNESFERIGTFQMSKLDEFVGDLKIWLSGAMTYEQTCLDGFENTTGNAGERMKEFLKSAQEMTSNGLAIVNELSGILGTLQIPGMSGRRLLEDEMPSWVSEGKRRLMQAGAASMKPDLVVAQDGSGKYKTINEALVDVPLKSNKTFVIYVKAGIYKEIVVIPKAMTHLTMYGDGPSKTVVTGSLNFIDGIQTFKTATFSAIGANFYARDMGFENTAGAAKHQAVALRVQSDRSIFYNCQIDGYQDTLYAHAHRQFYR…
ClPMEI16	Cla97C03G054320.1	ATGTGTTCTTCCCCTTCATTCCTCGTTGCTTTTACTCTTCATTTTTTGTCAATTTTCAACCCTTTTCTGTTAGCCCATGCAAATCAAAATACAAACGCCACCGTCAATAATTTTGCTCATGGGATTTGCAACAGGCTTATTCAATATAACGATCTATACAAAGTGTGCATTCCCGAGATTGATTCTGACCCTCGTGAAGATTTGAAGTCAGATTTGACAGGTCTTCTAATTATATTCGTGAATCATAGCATCAGCAATTTCAACGACAATATTGTATTTCTTAAGAAGGAGATAAATTCAGGGAAGGTGAATGGTGATACAAAAGACATAATGTCCATGTGTTTGGAAAACTTTGAAACAGGTATCAGTGCTCTGCAAGAGTCTTTGCACATACTACTA…	ATGTGTTCTTCCCCTTCATTCCTCGTTGCTTTTACTCTTCATTTTTTGTCAATTTTCAACCCTTTTCTGTTAGCCCATGCAAATCAAAATACAAACGCCACCGTCAATAATTTTGCTCATGGGATTTGCAACAGGCTTATTCAATATAACGATCTATACAAAGTGTGCATTCCCGAGATTGATTCTGACCCTCGTGAAGATTTGAAGTCAGATTTGACAGGTCTTCTAATTATATTCGTGAATCATAGCATCAGCAATTTCAACGACAATATTGTATTTCTTAAGAAGGAGATAAATTCAGGGAAGGTGAATGGTGATACAAAAGACATAATGTCCATGTGTTTGGAAAACTTTGAAACAGGTATCAGTGCTCTGCAAGAGTCTTTGCACATACTACTA…	MIEHMCAQTDYKDLCITSLTSDPNSFPADKLGLALVALRLASSNASDISESIKVMFNDTSLNEPAVQQGLFDCLDAYLNASQQLDDSIGAIIAKSYGDVQKWVNAAIADARTCEASFGTKPTVLTPKNEVFIKLCEIAMSISKIAEGEGN
ClPMEI17	Cla97C03G057500.1	ATGTCTTTGCTTAGACCTTACGGTAAGGTCGACGAAACCGACCAATTGAGGCTCGATGCTAGCCGGCGGACTCGGAAGAGGATTGCTGTCATTGTCTTGTCCTCTGTTGTTCTTGTTGGTGTTGTTGTTGGTGTTGTGTTTGGTACTATAAATGCTTCCAACAAAAATGATGACAGTAACAATCAAAATGGTGCACTTTCAACTTCAATCAAAGCAATTTGTGATGTGACTTTGTATCCTGATACATGTCACAATGCTTTTGGTCCTTTAGCTAACTTGAGCCATCTCAACCCCGGTGAGATATCCAAGCTTTCGGTTCAATTGGCTCTCGATGAATTGTCGCGAGTGGCTAACTACATTTTTGATCATGCCATTACCAATTCAACTGACAATAAGACC…	ATGTCTTTGCTTAGACCTTACGGTAAGGTCGACGAAACCGACCAATTGAGGCTCGATGCTAGCCGGCGGACTCGGAAGAGGATTGCTGTCATTGTCTTGTCCTCTGTTGTTCTTGTTGGTGTTGTTGTTGGTGTTGTGTTTGGTACTATAAATGCTTCCAACAAAAATGATGACAGTAACAATCAAAATGGTGCACTTTCAACTTCAATCAAAGCAATTTGTGATGTGACTTTGTATCCTGATACATGTCACAATGCTTTTGGTCCTTTAGCTAACTTGAGCCATCTCAACCCCGGTGAGATATCCAAGCTTTCGGTTCAATTGGCTCTCGATGAATTGTCGCGAGTGGCTAACTACATTTTTGATCATGCCATTACCAATTCAACTGACAATAAGACC…	MVFQDFDQISERRRAERARKFRKRVTIAVVSASVILLLVAAAVFVQVSSSSKSTTKNGDSKSSGNSKQPVPPDTKQVSRIEKMITMICNSTDYKGKCESTLKDGVHTDPDSSDPKDLIKLAISAAADEVKSAVKKASGFNFATPEEKGAFEDCKVLLEDAVEELEMSMSEVSKKNMGKLTAKTTPDLNNWLSAVMSYHETCVDGFPEGKMRTEMEKAVKAGKELTSNSLAMISQVASFFSTFEMPEGAATRRRLMANDGVPTWMDSNERRMLKGASAGVKPKPNVVVAKDGSGDFKTINEALAKMPAKYDGRYVIYVKEGIYEETVVITKKMANVTMYGDGSQKSMISGSKNFVDGVRTFQTATFVALGEGFLGQGMGFRNTAGPEKHQAVAARVQADR…
ClPMEI18	Cla97C03G065030.1	ATGACTTTCCACTCTCTCCGCCTCCTCCTCCTCCTCTCACTCTGTCTCTCTGCCGCCGCCCACGACGGCGCTGCCGTCTCCCAAGATCTGATCCGCTCCTCCTGCCTCCAAGCAAGCTACCCAAATCTCTGCGTCAGAACCCTCTCCTCCTACGGCGGCGCCGTCAACACATCACAGGATCTTGCCCAAGCCGCCATCTCCGTCAGCCTCTCCCTCGCCCGCGACCTCTCCCGGTATCTCTCCGACGCCCGCCGGCAGGCGTCGAGGCGGCAGCGCGCGGCGGTGAATGACTGCGTGGATCAGATTGGGGACTCTGTTGAGGAGCTGAGCAACACTTTGAGCGTCCTCCGGCACCTCCCCTGCGGCAGCGACCGGCGGGCTTTCCGGCTGCAGATGGGG…	ATGACTTTCCACTCTCTCCGCCTCCTCCTCCTCCTCTCACTCTGTCTCTCTGCCGCCGCCCACGACGGCGCTGCCGTCTCCCAAGATCTGATCCGCTCCTCCTGCCTCCAAGCAAGCTACCCAAATCTCTGCGTCAGAACCCTCTCCTCCTACGGCGGCGCCGTCAACACATCACAGGATCTTGCCCAAGCCGCCATCTCCGTCAGCCTCTCCCTCGCCCGCGACCTCTCCCGGTATCTCTCCGACGCCCGCCGGCAGGCGTCGAGGCGGCAGCGCGCGGCGGTGAATGACTGCGTGGATCAGATTGGGGACTCTGTTGAGGAGCTGAGCAACACTTTGAGCGTCCTCCGGCACCTCCCCTGCGGCAGCGACCGGCGGGCTTTCCGGCTGCAGATGGGG…	MSFAYTHRFIALAFSFLVAFNLQSTASNDIVSRTCEISAASDPNVRLDFCLQSLAVDPASDTADLFKLGTISIKLIRRNATSTQRYIERLLKKKKNLSPDSNVRPRLIDCKELYSDAVETVRDAAAEYARKRYEEANVKLSSVMDAVTTCEDGFKEIEGGVSPLTKRNGDSFELTAIALCILKMRP
ClPMEI19	Cla97C03G067530.1	ATGTTAAGAGTTTCTTTAGCCATTCATCTTTTTACGTTGATCTTTATTCCCGCATTACAAGTTTCCTGCATTGATGTTATCTACCCGAATGAGCAGAATAATGTTAGACAATCCATGATTTCTCAGATTTGTGCAGATATCGAAGATCAAAATTCATGCATTTCGAACATACAACTTGAGATGGGAAGAAGTGTGAACTCAAGTCCAAGTTCTGTCTTGAGTGCTGCAATTAGAGCAACTCTTAATGAAGCTAGACGAGCCATAGAGTCTATAACAAAGTTCAGCACATTCTCGTTTAGCTACCGTGAAGAAATGGCAATCGAGGACTGCAAGGAGCTTCTTGATTTCTCTGTTTCAGAGCTTGCCTGGTCATTAGCTGAGATGAAAAGGATTCGTGCA…	ATGTTAAGAGTTTCTTTAGCCATTCATCTTTTTACGTTGATCTTTATTCCCGCATTACAAGTTTCCTGCATTGATGTTATCTACCCGAATGAGCAGAATAATGTTAGACAATCCATGATTTCTCAGATTTGTGCAGATATCGAAGATCAAAATTCATGCATTTCGAACATACAACTTGAGATGGGAAGAAGTGTGAACTCAAGTCCAAGTTCTGTCTTGAGTGCTGCAATTAGAGCAACTCTTAATGAAGCTAGACGAGCCATAGAGTCTATAACAAAGTTCAGCACATTCTCGTTTAGCTACCGTGAAGAAATGGCAATCGAGGACTGCAAGGAGCTTCTTGATTTCTCTGTTTCAGAGCTTGCCTGGTCATTAGCTGAGATGAAAAGGATTCGTGCA…	MDQINALKGYGKVTHIELEDQIPPPSKPNSKFLNHKSPRLIAAISAVVLTALIIFLIIGAYIHNSPAGNKSSNSADTINIACNVTRYPNSCFTSIYSLNSSPEPDPKLILKLSLQVSLNELSNMSRWLKTLAAKGDGGAALKDCESQIEDAISQVKDSAAEMEPSAGEKTLTESKIGNIQTWMSSAMTEQESCLDGVEEMDSTSFQEVKTRMKKSMEYVSNSLAIVANIHVILEKFNMPLH
ClPMEI20	Cla97C03G067540.1	ATGGGTTATAGAGATGATGATTCTCAGAACAAGAAAAGATACGCCATCATCGGTGTCTCGTCCATGTTACTAGTGGCGATGGTGGTGGCGGTGACGGTTGGCGTTAACCTAAACCAAGACGAAACGAGCGAACCGGCTACCGGAAACAAAGCCCATGAAATATCTGCTTCAGTGAAAGCCATTAAAGCCATTTGTCAACCTACTGATTATAAACAAGAATGTGTTGCTAGTCTCAAGGCTGCTGGCAACAACTCTTCAGACCCAAAGGAATTGGTTCAAGCTGGCTTCAAGGCTGCCATGAAGTTGATCCAAGCTGCTGCTAATAAATCTGTCACCTTGAAAGAGCTTGAGAAAGACCCTAGAACCTCCAAGGCCCTTGCTGGTTGTAAAGAGCTCATG…	ATGGGTTATAGAGATGATGATTCTCAGAACAAGAAAAGATACGCCATCATCGGTGTCTCGTCCATGTTACTAGTGGCGATGGTGGTGGCGGTGACGGTTGGCGTTAACCTAAACCAAGACGAAACGAGCGAACCGGCTACCGGAAACAAAGCCCATGAAATATCTGCTTCAGTGAAAGCCATTAAAGCCATTTGTCAACCTACTGATTATAAACAAGAATGTGTTGCTAGTCTCAAGGCTGCTGGCAACAACTCTTCAGACCCAAAGGAATTGGTTCAAGCTGGCTTCAAGGCTGCCATGAAGTTGATCCAAGCTGCTGCTAATAAATCTGTCACCTTGAAAGAGCTTGAGAAAGACCCTAGAACCTCCAAGGCCCTTGCTGGTTGTAAAGAGCTCATG…	MEKTLGVFIFLHFFLLSSPVFSKPTFNGIDWWCKKTTYPETCKYFFNHGSKAIPKDMTEFKKMVIQFAMERALNAESYTKDVGSKCRNGKEKAAWADCLKLYQNTILQLNQTLDSSTSCTDFDIQTWLSTALTNLETCRTGFAELNVSDYILPMIMSNNVTRLISNSLAINNASGGVVLGKETYKKGFPSWVSGGDRRLLQSSSSSSSIKVDIVVAQDGSGNYTTVGAAVEEAGKRKGNGRFVIQVKRGVYEENVEIGSKMKNIMLIGDGMRFTFITGNRSVGGGSTTFNSATVAVTGEGFIARGITFRNTAGPENHQAVALRSSADLSVFYRCAFEGYQDTLYVHSQRQFYKECYIYGTVDFIFGNGAVVVQNCMIYARKPMNGQKNAVTAQGRTDPN…
ClPMEI21	Cla97C03G067560.1	ATGAAACCCATTTCCATTGTCATAACTGTTCTAGTTGTTTCAGTTTGCCAGTTCCAAATCCTTGCCCAAACTCCACAAACTCCACAAACTCCACAGACTCCACAAACTGCAACCGTCCCTGGAGGCAATGATCTCATCACCAAAACCTGCAGCAGCACACATTACAATGAAATGTGCAGAACAATCTTACAATCATCTCCCAACAGCAATGGAGCAGATCTCTATGGTCTAGCACAAATTGTAATGAACATTGCATCAGAGAATGTCAGCAACATATATGAAAGCATAAACCAATTGCAAAATGGAACATCAGTAGACAGTTTCTTAGACGATTGCTTGACAGATTGCTTGGAGAGCTATCAGGATGCCATTGATCAAATTGAAGATTCAGTCACAGCA…	ATGAAACCCATTTCCATTGTCATAACTGTTCTAGTTGTTTCAGTTTGCCAGTTCCAAATCCTTGCCCAAACTCCACAAACTCCACAAACTCCACAGACTCCACAAACTGCAACCGTCCCTGGAGGCAATGATCTCATCACCAAAACCTGCAGCAGCACACATTACAATGAAATGTGCAGAACAATCTTACAATCATCTCCCAACAGCAATGGAGCAGATCTCTATGGTCTAGCACAAATTGTAATGAACATTGCATCAGAGAATGTCAGCAACATATATGAAAGCATAAACCAATTGCAAAATGGAACATCAGTAGACAGTTTCTTAGACGATTGCTTGACAGATTGCTTGGAGAGCTATCAGGATGCCATTGATCAAATTGAAGATTCAGTCACAGCA…	MGYRDDDSQNKKRYAIIGVSSMLLVAMVVAVTVGVNLNQDETSEPATGNKAHEISASVKAIKAICQPTDYKQECVASLKAAGNNSSDPKELVQAGFKAAMKLIQAAANKSVTLKELEKDPRTSKALAGCKELMDFAVDELKYSMNKLGEFDISKLDEMLIDIKIWLSATITYQETCLDGFENTTGNAAEKMKKALKTSMRLSSNGLAMVSQISSMLTELQIPGISRRRLLEIPVLGHDDYPDWANPGMRRLLAAGTKVKPNVVVAKDGSGQFRTIQEALDKVPKRKNNATFVIHIKAGVYKEYLIIKKSLTHLMLIGDGPKKTIITGSKNFIDGTPTFKTATVAVTAEHFMARDIGFENTAGPHKHQAVALRVQADKAVFYNCEMHGYQDTLYVHTMRQ…
ClPMEI22	Cla97C04G079400.1	ATGGATCAAATCAATGCTCTCAAAGGCTATGGCAAAGTGACTCACATCGAGCTCGAAGATCAAATCCCCCCGCCGTCCAAACCAAACTCCAAATTCCTCAACCACAAATCTCCCCGTCTCATCGCCGCCATCTCCGCCGTCGTCCTCACTGCTCTCATCATCTTTTTGATCATCGGAGCCTACATCCACAACTCCCCCGCCGGCAACAAATCATCCAATTCGGCCGACACAATCAACATCGCCTGCAACGTAACTCGTTACCCTAATTCCTGCTTCACCTCAATATATTCTCTCAATTCCTCTCCTGAACCCGATCCCAAACTCATTTTAAAGCTCTCTCTCCAAGTTTCCCTCAACGAACTCTCGAATATGTCCCGGTGGCTAAAAACCCTAGCCGCA…	ATGGATCAAATCAATGCTCTCAAAGGCTATGGCAAAGTGACTCACATCGAGCTCGAAGATCAAATCCCCCCGCCGTCCAAACCAAACTCCAAATTCCTCAACCACAAATCTCCCCGTCTCATCGCCGCCATCTCCGCCGTCGTCCTCACTGCTCTCATCATCTTTTTGATCATCGGAGCCTACATCCACAACTCCCCCGCCGGCAACAAATCATCCAATTCGGCCGACACAATCAACATCGCCTGCAACGTAACTCGTTACCCTAATTCCTGCTTCACCTCAATATATTCTCTCAATTCCTCTCCTGAACCCGATCCCAAACTCATTTTAAAGCTCTCTCTCCAAGTTTCCCTCAACGAACTCTCGAATATGTCCCGGTGGCTAAAAACCCTAGCCGCA…	MAQTDDCAVTGFLFSGSPISISNIKIKLLVLAVWAALVLTGVSSDEHVRSTCAMTLYPELCETTISSGVGSKSSKEAIESSVNITIGAVKDNYKRIKKLVKTGKNLRKREKIALNDCLETGEETLRELYEVVDDLHEYPNKKSLSQYADDLKTFLSSAITNQETCVDGFSHDKADKKVRESLEAGLIHVEKLCSVALALIKNLTDTDIANHNDNLINRNQLTEINNGRDHDGINWPHWMSPGDRRLLQASSTATPDVVVAADGSGNFRTVSEAVAAAPNRSSRRYIIRIKAGVYRENVNVPSSKTNIMFWGDGRTTTIITGNRNVVDGSTTFNSATVAAVGERFLARDITFQNTAGPSKHQAVALRVGSDLSAFYRCDMLAYQDTLYVHSNRQFYVKCI…
ClPMEI23	Cla97C05G082930.1	ATGCCCTTCCCCGTCGCTACCTTTCTACTCCTCTTCTTACCCCTGGTAGTGGTGGCTTCCTCTATTTCTTCGTTGCCCGAGCTGGACCCGGTTCGGTTCGCCCAGACCGGGGTTGCGGAAGCCAGAACCGAAATAGGTAAGTTAAAACGACGTCGATTTGGGCTTGGCGATTGCTCTACGCTCTACGAGGAGGCGGACTGGCGGCTCGCCGGGATGTTGGTTGGAGAGAATTATACGGCGGAAGATGCTCGGGCGTGGCTTAGCGCCGCCGTGGCTAACCATCGGAGTTGTTTGGATGGCTTGGAAGAGGTTGGTGCCGCGACGGCGGTGGAATATGGGAATAACTTGACCGTGATGCTCACCGGAGCTCTGCATTTATACGACAAGATTGCTGCTGTG…	ATGCCCTTCCCCGTCGCTACCTTTCTACTCCTCTTCTTACCCCTGGTAGTGGTGGCTTCCTCTATTTCTTCGTTGCCCGAGCTGGACCCGGTTCGGTTCGCCCAGACCGGGGTTGCGGAAGCCAGAACCGAAATAGGTAAGTTAAAACGACGTCGATTTGGGCTTGGCGATTGCTCTACGCTCTACGAGGAGGCGGACTGGCGGCTCGCCGGGATGTTGGTTGGAGAGAATTATACGGCGGAAGATGCTCGGGCGTGGCTTAGCGCCGCCGTGGCTAACCATCGGAGTTGTTTGGATGGCTTGGAAGAGGTTGGTGCCGCGACGGCGGTGGAATATGGGAATAACTTGACCGTGATGCTCACCGGAGCTCTGCATTTATACGACAAGATTGCTGCTGTG…	MVRKVVVSGISLILVVGVALAVVAMVHKSNSSNAAMEDMSPKMKAISTICSTTDYQQECKNTLSKIAHNASSNDPKDYVRAAVLATIEEITKGYNLSDSLMVEAANNATIKMSVEDCKDLLQFAIDELHASYSTVGDSDLHTDADRVADIKNWLSAVISYQQSCLDGLEEFDPQLKQKMQDNLDVAGKLTSNALAIVSAVSNMLKNYDLQLKVQPSGRRLLGTTEVGSDGFPTWLSGADRKLLAARGGARPRPNAVVAKDGSGQYKSIAAALAAYPKALRGRYVIYVKAGIYDEYITVTKNMKNVFMYGDGPRKTIVTGRKNNRDGITTQNTASFSALGDGFLCKSMGFSNTAGPEGHQAVALRVQSDRSAFFNCRMDGHQDTLYVQNHRQFYRNCVIS…
ClPMEI24	Cla97C05G082940.1	ATGGGAAGGCATTCGACCACCTTTGTTGTTGTTCTTATTGTTCTTCTTATTCCGACCGAGATTTTTTGTTATTCCGAAAAAGAAATAAAACGTTGGTGTAGCCAAACGCCATATCCAGCTCCATGTGAGGAATTTCTCAAAACCAAAGCCTTAACAAACAAATCTCCAATAGTCAATAAATCCCATTTCTTTGAAATCTTAGTCCAAACGGCACTCGAACGTGCCGTTTCGGCCCATAAAAACGCTCTTTCTCTCGGCCCAAAATGCCGAAATGCCAAAGAAAAAACCGCATGGACTGATTGTGTTGACCTCTACGACCAAATCATAACCCGCCTCAACCGAACCGCCGACCGCTGCTCCCCGGTTGACGCACAAACCTGGCTCAGCGCCGCTCTCACC…	ATGGGAAGGCATTCGACCACCTTTGTTGTTGTTCTTATTGTTCTTCTTATTCCGACCGAGATTTTTTGTTATTCCGAAAAAGAAATAAAACGTTGGTGTAGCCAAACGCCATATCCAGCTCCATGTGAGGAATTTCTCAAAACCAAAGCCTTAACAAACAAATCTCCAATAGTCAATAAATCCCATTTCTTTGAAATCTTAGTCCAAACGGCACTCGAACGTGCCGTTTCGGCCCATAAAAACGCTCTTTCTCTCGGCCCAAAATGCCGAAATGCCAAAGAAAAAACCGCATGGACTGATTGTGTTGACCTCTACGACCAAATCATAACCCGCCTCAACCGAACCGCCGACCGCTGCTCCCCGGTTGACGCACAAACCTGGCTCAGCGCCGCTCTCACC…	MSDDGGKNKKAALIGVSSLFLVAMVVAVAVGVNRKDSDIAGGRGATAEISTSTKAIKALCQPTDYQETCETALSQAGTNTSDPRELIKAGFHVAVDQIKWAIGNSSTLKDSASDPMAKQALDACGELMDYAIDDLLISFDRITDNFDIQKIDDYIEDLKVWLSGALTYQETCLDGFENVTGDTGEKMKNLLKMSKELTANGLGMVSEVTSIMTSFGLPSAGRRLLEESDEQEKEPSWVSDRRGLLQATGATIKADVVVAKDGSGKYKTVSEALNDVPKKSNKTFVIYVKAGVYQEQVMIEKSMTWVMMIGDGPTKTKITAGKNFIDGTPTFKTATVAVIGTNFIAKDMGFENSAGPEKHQAVALRVQSDMSIFYNCQMDGYQDTLYTHAHRQFYRDCTI…
ClPMEI25	Cla97C05G083460.1	ATGAGTTTCGCTTATACGCACCGTTTCATCGCGCTCGCATTTTCCTTCTTAGTCGCCTTCAATCTCCAATCCACTGCCTCAAACGACATCGTTTCACGAACCTGCGAAATCTCCGCCGCAAGCGATCCGAACGTCCGCCTCGACTTCTGTCTCCAATCACTCGCTGTCGATCCCGCGAGCGACACGGCGGACCTTTTCAAACTCGGCACGATTTCAATCAAGTTGATCAGAAGGAACGCGACCAGTACGCAGCGATACATCGAGCGATTACTGAAGAAGAAGAAGAATCTGTCGCCGGATTCGAACGTGAGGCCGCGGCTGATCGATTGTAAAGAACTCTACTCTGACGCTGTCGAGACGGTGCGCGATGCGGCGGCGGAGTACGCGCGGAAGCGCTAT…	ATGAGTTTCGCTTATACGCACCGTTTCATCGCGCTCGCATTTTCCTTCTTAGTCGCCTTCAATCTCCAATCCACTGCCTCAAACGACATCGTTTCACGAACCTGCGAAATCTCCGCCGCAAGCGATCCGAACGTCCGCCTCGACTTCTGTCTCCAATCACTCGCTGTCGATCCCGCGAGCGACACGGCGGACCTTTTCAAACTCGGCACGATTTCAATCAAGTTGATCAGAAGGAACGCGACCAGTACGCAGCGATACATCGAGCGATTACTGAAGAAGAAGAAGAATCTGTCGCCGGATTCGAACGTGAGGCCGCGGCTGATCGATTGTAAAGAACTCTACTCTGACGCTGTCGAGACGGTGCGCGATGCGGCGGCGGAGTACGCGCGGAAGCGCTAT…	MDTVKSFKGYGKVDELEQQAFRQKTRRRLIILLLSILLLIALVIGAVVGIVIHKRNSSSSSPTSSAPPTELTPAASLKTLCSVTQYPSSCQSSLQNSNTTDPVFLFKLSLRVATDSLSKLSDYTSTLNSNTGDPKVKAAIEICRSVFEDAIDTLNDTVSSMEVDHHSEKFLSPSRIEDLKTWLSTTITDQETCLDAVRDLNQTTLLQNLQTAMANSTEFTSNSLAIVTKILGLLADFNIPIHRKLMGLPEWLSSGDRRLLQENNVTAHMTVSKDGKGHYTTIKDAVAAVPKKSKERFIIHVKEGIYEENVILDKNKWNVMMYGDGRTKTIVSGHLNFIDGTPTFSTATFAVAGKGFIGKDMGFINTAGPAKHQAVAFRSGSDLSVMSGCSFDGYQDTLY…
ClPMEI26	Cla97C05G087810.1	ATGTCTGATGATGGAGGGAAGAACAAGAAAGCTGCTCTCATCGGCGTATCTTCCTTGTTTCTTGTTGCCATGGTAGTTGCTGTGGCAGTCGGTGTCAATCGCAAAGACTCCGACATCGCTGGTGGCCGCGGTGCCACGGCGGAGATCTCCACCTCCACCAAAGCCATTAAGGCTCTCTGTCAGCCCACCGATTACCAAGAAACCTGCGAGACAGCTCTGTCCCAAGCCGGGACCAACACAAGCGACCCACGTGAGCTAATCAAAGCCGGATTCCATGTCGCCGTCGACCAAATCAAATGGGCCATCGGAAATTCCTCCACCTTGAAAGATTCCGCCAGTGATCCCATGGCTAAACAAGCTCTTGACGCTTGTGGCGAGCTAATGGATTACGCAATTGAC…	ATGTCTGATGATGGAGGGAAGAACAAGAAAGCTGCTCTCATCGGCGTATCTTCCTTGTTTCTTGTTGCCATGGTAGTTGCTGTGGCAGTCGGTGTCAATCGCAAAGACTCCGACATCGCTGGTGGCCGCGGTGCCACGGCGGAGATCTCCACCTCCACCAAAGCCATTAAGGCTCTCTGTCAGCCCACCGATTACCAAGAAACCTGCGAGACAGCTCTGTCCCAAGCCGGGACCAACACAAGCGACCCACGTGAGCTAATCAAAGCCGGATTCCATGTCGCCGTCGACCAAATCAAATGGGCCATCGGAAATTCCTCCACCTTGAAAGATTCCGCCAGTGATCCCATGGCTAAACAAGCTCTTGACGCTTGTGGCGAGCTAATGGATTACGCAATTGAC…	MASHYKILFFSITLFSILSNISGNNTINKWCKTTPHPKVCISFMSPIKPPPLNRPEFRTMAIRTAFEKAVEAQNYATRFGPSCKTTRQRAAWTDCLKLYNDVVFQLNRTLQCVLSDGTIQRRRCTDFDAQTWLSSALTDIDLCLSGAADLNVTDFIAPIKCQNVSKMISNCLAINGVFLKEGVKSVNRIGVEFDQNGSFPMWVSDGDRKLLQSSAKVRANLVVAKDGSGKFRTVQAAIDAAARRRGRGRFVIYVKRGVYRENIEVGNDNGNLMLVGDGMRFTVITSGRSVAAGFTTFSSATAGIQGPGFIARDIRFVNTAGPRMGQAVALRSSSDLSVFHRCSFEGYQDTLMVLSQRQFYKQCYIYGTIDFIFGNAAVVLQNCMIYVRRPLKGQVNVIT…
ClPMEI27	Cla97C05G089160.1	ATGGAGAAAACTCTTGGGGTATTCATTTTTCTTCACTTCTTTCTACTATCTTCACCAGTCTTTTCCAAGCCTACCTTTAATGGCATCGATTGGTGGTGCAAAAAAACCACATACCCCGAAACTTGCAAATACTTTTTCAACCATGGAAGCAAAGCTATTCCCAAAGACATGACTGAGTTCAAGAAAATGGTGATCCAATTTGCCATGGAAAGAGCTCTGAATGCTGAGAGTTACACGAAAGATGTCGGCTCCAAGTGCCGAAACGGGAAGGAAAAGGCAGCTTGGGCTGATTGTTTAAAGCTTTACCAAAACACCATCCTTCAACTCAACCAAACTCTAGATTCCTCTACTAGCTGTACTGATTTCGATATCCAAACCTGGCTTAGTACTGCCTTAACC…	ATGGAGAAAACTCTTGGGGTATTCATTTTTCTTCACTTCTTTCTACTATCTTCACCAGTCTTTTCCAAGCCTACCTTTAATGGCATCGATTGGTGGTGCAAAAAAACCACATACCCCGAAACTTGCAAATACTTTTTCAACCATGGAAGCAAAGCTATTCCCAAAGACATGACTGAGTTCAAGAAAATGGTGATCCAATTTGCCATGGAAAGAGCTCTGAATGCTGAGAGTTACACGAAAGATGTCGGCTCCAAGTGCCGAAACGGGAAGGAAAAGGCAGCTTGGGCTGATTGTTTAAAGCTTTACCAAAACACCATCCTTCAACTCAACCAAACTCTAGATTCCTCTACTAGCTGTACTGATTTCGATATCCAAACCTGGCTTAGTACTGCCTTAACC…	MLMFFSNFLITQSSNNTSSLIFKTCKTSSDQDPNISFNFCLTSLQPAASKHHHGATSLRRLGLITIYLIRHNMSSTRHHIKKLRRNKGLTDPLVKSCLADCLELYSDAIPTVKQAGKDYKAGRYADANSKISSVMDDCSTCEDGFKEKEGVISPLTNRNHNAFELSAIALSIINMLA
ClPMEI28	Cla97C05G089170.1	ATGTGTATGAATCCACGGGACCCTTACGCCAACACTTTAATTTACACCATTTTTCATTTGTTTATAAATACAAAACCCATTTCTCCTCTCTCCCTTCATCACTTCCCCTTCTTCCTTAATTCCATCCATTTACAGAAAACAAAAACAGAGATGGGTTTCTCAAATTCCAAGAAAATTTTCATTATTTTCCAATTAATTCTCCAATTAACATTCATTCATTCAGCCATAACTCCACAAAGCAGCACAGAATTCATAAAAACCTCATGCAGTTCCGCCACTTACCCTCGTCTCTGTTTTTCCTCTCTTTCTGTCCACGCCAATGCCATTCAAACAAGCCCTCGCCTTTTGGCCACCGCCGCCCTCTCCGTCTCTCTCTCCTCTGTCAAGTCCGCCGCCACT…	ATGTGTATGAATCCACGGGACCCTTACGCCAACACTTTAATTTACACCATTTTTCATTTGTTTATAAATACAAAACCCATTTCTCCTCTCTCCCTTCATCACTTCCCCTTCTTCCTTAATTCCATCCATTTACAGAAAACAAAAACAGAGATGGGTTTCTCAAATTCCAAGAAAATTTTCATTATTTTCCAATTAATTCTCCAATTAACATTCATTCATTCAGCCATAACTCCACAAAGCAGCACAGAATTCATAAAAACCTCATGCAGTTCCGCCACTTACCCTCGTCTCTGTTTTTCCTCTCTTTCTGTCCACGCCAATGCCATTCAAACAAGCCCTCGCCTTTTGGCCACCGCCGCCCTCTCCGTCTCTCTCTCCTCTGTCAAGTCCGCCGCCACT…	MENTKLSLPLFAALLLTNAIVVLANSNENSDMNNNSSVIENSCAITLYPQLCQSTIYSIVGTSNLLSLKDIVEVSLSVAVDAAKHNYKSINKLWMSLNDVSKRDKIALRDCVETTDRAIYELHKAVEDLREYPNKKSLTLYADDLKTFLSSAITNQETCLEGLSHEKRVLKLIESTHIHVTKLCSNTLALVKKLTHTHFTNQKTNKITSDHPTIVLFSHPVDQEEGENRGIREDLEDGIKWPKWMASRDRRLLESSYEATADVVVAADGSGNYKTVSEAVAAAPSKSSKRYVIRIKGGVYKENVDVPSSKTNIMFWGDGRSNTIITASRSVGGGSTTFNSATVAAVGDGFLARDITFQNTAGAANDQAVALRVGSDRSAFYRCGMLAYQDTLYVHSNRQ…
ClPMEI29	Cla97C05G089190.1	ATGGAATCTCAAATCCTAAAATCCTTACAAACCCTTTTCTTCTTCATTATTTTAACTACATTCACCACCTCCGCCGTGGCCTGTTCTTCCTCCACAGTCCGAAAGACCTGCAAGCCGACGCCATATCCGCGGCTTTGCGAGACTGCACTCTCCTTATATGCTTCACAAACCAAAAGAAACCAGCAAGAGCTCTGCAGGGCGGCCATGGTTTCTTCTCTCAAAGCTGCACAAAATGCCACCTCCATCGTCTCCAAACTCTCCCGGAAGAAGGTGTCGCCCTACGAAGCCCAAGTCCTTAGAGATTGCATTGATAATCTCAATGACTCCGTCGACGAGCTCCGTCAAGCTATCGCTGCCATTAAAAGCTTGAGTCCGCGGTCTAACGATGTGGAGTTCCAG…	ATGGAATCTCAAATCCTAAAATCCTTACAAACCCTTTTCTTCTTCATTATTTTAACTACATTCACCACCTCCGCCGTGGCCTGTTCTTCCTCCACAGTCCGAAAGACCTGCAAGCCGACGCCATATCCGCGGCTTTGCGAGACTGCACTCTCCTTATATGCTTCACAAACCAAAAGAAACCAGCAAGAGCTCTGCAGGGCGGCCATGGTTTCTTCTCTCAAAGCTGCACAAAATGCCACCTCCATCGTCTCCAAACTCTCCCGGAAGAAGGTGTCGCCCTACGAAGCCCAAGTCCTTAGAGATTGCATTGATAATCTCAATGACTCCGTCGACGAGCTCCGTCAAGCTATCGCTGCCATTAAAAGCTTGAGTCCGCGGTCTAACGATGTGGAGTTCCAG…	MSLLRPYGKVDETDQLRLDASRRTRKRIAVIVLSSVVLVGVVVGVVFGTINASNKNDDSNNQNGALSTSIKAICDVTLYPDTCHNAFGPLANLSHLNPGEISKLSVQLALDELSRVANYIFDHAITNSTDNKTILALENCHELLDLALDHLNISLSSSDITLLKAVDDLKTWLTSAATYQQTCIDGLAEVDPALANLIANYLKNSTELTSNGLAILSFFSKLTDSLSLRRLMTYDNRQSKGDWVRPILRKLAQTDIRKQANIVVAVDGSGKYKTISAALKAVPDKSKKRIVIYVKKGTYKENVEVKKNKWNVVMVGDGMNATTVIGSLNFIDGTPTFSTATFAAKGKGFIAIDMGFKNTAGPSKHQAVALMSTSDQSIFYRCRIEAYQDSLYAHSNRQF…
ClPMEI30	Cla97C05G091180.1	ATGGGCTACGGCAGGCTCCACAAAACCGACCCCGGCGGCACTTCTTCCTCCGCCGCTGCCTTCCAACTCCCCGACCAACCCCTTTCATTTACCCCTCCCAACCCAAGGAGAACACGCCTTTTCCTTATTTCCCTTCTTTCTCTCCTTCTCATCGTCGCCGCCGCTGTCTCCGCCACCTTTCTCATCGGACTCCGAACTGCCTCCCCGGCTCGATCCGACCCCAACCTCCCTCGAAAACCAACTCAGGCTATTTCCAAGGCTTGTGGTCGAACTCGCTTCCCGACTCTCTGTGTCAACTCGCTCCTCGATTTCCCTGGTTCTCTCAACGCCAACGAACAGGATCTCGTCCACATTTCCTTCAATATCACTCTCCAGCATCTCAACAAAGCGCTCTATTTG…	ATGGGCTACGGCAGGCTCCACAAAACCGACCCCGGCGGCACTTCTTCCTCCGCCGCTGCCTTCCAACTCCCCGACCAACCCCTTTCATTTACCCCTCCCAACCCAAGGAGAACACGCCTTTTCCTTATTTCCCTTCTTTCTCTCCTTCTCATCGTCGCCGCCGCTGTCTCCGCCACCTTTCTCATCGGACTCCGAACTGCCTCCCCGGCTCGATCCGACCCCAACCTCCCTCGAAAACCAACTCAGGCTATTTCCAAGGCTTGTGGTCGAACTCGCTTCCCGACTCTCTGTGTCAACTCGCTCCTCGATTTCCCTGGTTCTCTCAACGCCAACGAACAGGATCTCGTCCACATTTCCTTCAATATCACTCTCCAGCATCTCAACAAAGCGCTCTATTTG…	MLRVSLAIHLFTLIFIPALQVSCIDVIYPNEQNNVRQSMISQICADIEDQNSCISNIQLEMGRSVNSSPSSVLSAAIRATLNEARRAIESITKFSTFSFSYREEMAIEDCKELLDFSVSELAWSLAEMKRIRAGKNEAPDEGNLKAWLSAALSNQDTCLEGFEGTDRHIVGFIRGSLKQVTLLISNVLALYTQLHSLPFQPPRNETIEKTKNSEFPDWMMDSEHKLVKSHPRNVHVDAVVALDGSGDFRSITEAVNETPNYSNRRYIIYVKKGVYKENIDMKRKKTNIMFIGDGIGETIVTGNRNFLQGWTTFRTATVAVSGKGFIARDMTFRNTAGPENHQAVALRVDSDQSAFFRCSFEGHQDTLYVHSLRQFYRECNIYGTIDYIFGNGAAVFQKC…
ClPMEI31	Cla97C05G103840.1	ATGAACTCAGTTCCATTCATTTGCCTTCTCCTTCTCTCTCTCCTTCTCGCCGGAGCTTCCGATTCTTCTCCGCCGTCTACCGCCCTCTGTAAATCCACTCTCTACCCTAAGCTCTGCCGCTCCATTCTCTCATCCATCCGGTTCTCCCCCTCCGATCCATACGGCTACGGGAAATTCTCCGTCAAGAAATGTCTCAAACAAGCGATCAAAATGTCGAGCGTAATCAGCGACTATCTCGACCGAGGACGCGATTCGAGGCTGAATCAGCGGGAGGCCGGCGCTCTGAATGACTGCAGAGAACTTTCCGATTTGAATGTGGAGTTTCTTCGGTCGATCCAGGGCGTATTGGAGGCGGCGGAGGGCGTCGATGAGGAACTGGTGGAGCGCGTTGAGAGTATT…	ATGAACTCAGTTCCATTCATTTGCCTTCTCCTTCTCTCTCTCCTTCTCGCCGGAGCTTCCGATTCTTCTCCGCCGTCTACCGCCCTCTGTAAATCCACTCTCTACCCTAAGCTCTGCCGCTCCATTCTCTCATCCATCCGGTTCTCCCCCTCCGATCCATACGGCTACGGGAAATTCTCCGTCAAGAAATGTCTCAAACAAGCGATCAAAATGTCGAGCGTAATCAGCGACTATCTCGACCGAGGACGCGATTCGAGGCTGAATCAGCGGGAGGCCGGCGCTCTGAATGACTGCAGAGAACTTTCCGATTTGAATGTGGAGTTTCTTCGGTCGATCCAGGGCGTATTGGAGGCGGCGGAGGGCGTCGATGAGGAACTGGTGGAGCGCGTTGAGAGTATT…	MVGKVVLSGISLILVVGVALAVVAVVNKSNSSDAAAEDLSPKMKAVSSICSTTDYHQECQNTLTHVAQNSSIDDPKEYVKAAVLATMEEIKKGYNLTDNLMIEAANNATIKMSVDDCKDLLQFAIDELQASYTTVGDPDLHTNEDRVADIKNWLTAVISYQQSCLDGLEEFDPQLKQKMQDGLDVAGKLTSNALAIVGAVSDILKNLGLQLKVQPSSRRLLGTTEVGSDGYPTWLSGADRKLLAARRGGGGRVKPNAVVAKDGSGQYKSIAAALAAYPKALRGRYVIYVKAGIYDEYITVTKNMKNVFMYGDGPRKTIVTGRKNNRDGITTQNTASFAAIGEGFLCKSMGFRNTAGPQGHQAVALRVQSDRSAFFNCRMDGYQDTLYVQTHRQFYRNCV…
ClPMEI32	Cla97C05G107730.1	ATGGCTGGAAGGCATTTGGTTTCTTTCTCATTGGTCATTCTCGCCGTCGCCGCCTTAACCGGCCAAGCTCACGGATCCGCCATCTGCGACAAAGCTGATTTCCCTGCACTCTGCCGGTCCACCGTGAAAGACGCCTCCGATCCGACATCCGCCATGACGGCCGCCATCGAACACCTCATTTTCGAAACAGAACACGCGAAAGATTCGAGCCAGAAGATCGGCAATTTGAAGTCTCTAAGCGTGTGCAAACAGAACTTCGACGACGCCCTTGACGATCTGCAGAAAAGTTTGCAGTATTTGAAGAACAACGACATTCCGAGCCTGAAAATCAGCCTCTCCGGAGCACTGACTGACTACTCCACGTGCGACGATGCGGTGATAGAAAACGGCGACGAGAAG…	ATGGCTGGAAGGCATTTGGTTTCTTTCTCATTGGTCATTCTCGCCGTCGCCGCCTTAACCGGCCAAGCTCACGGATCCGCCATCTGCGACAAAGCTGATTTCCCTGCACTCTGCCGGTCCACCGTGAAAGACGCCTCCGATCCGACATCCGCCATGACGGCCGCCATCGAACACCTCATTTTCGAAACAGAACACGCGAAAGATTCGAGCCAGAAGATCGGCAATTTGAAGTCTCTAAGCGTGTGCAAACAGAACTTCGACGACGCCCTTGACGATCTGCAGAAAAGTTTGCAGTATTTGAAGAACAACGACATTCCGAGCCTGAAAATCAGCCTCTCCGGAGCACTGACTGACTACTCCACGTGCGACGATGCGGTGATAGAAAACGGCGACGAGAAG…	MVNKVVLSGISLILVVGVALAVVAVVNNNKNSDASTENLSPKMKAVSTICSTTNYQQECQNTLSNVAHNSSSDDPKEYVKAAILATIDEVKKGYNLTDGFMIEAANNASIKMGVEDCKDLLQFAIAQLQASYSTVGDPDLHTNADRVADIKNWLTAVISYQQSCLDGLGEFDPQLKQKMQDGLDVASKLTSNALAIVDAVSDILANFGLQLKVQPSGRRLLGTIEVGSDGFPTWMSGADRKLLASRGGGARVKPNAVVAKDGSGQFKTIGAALAAYPKALKGRYVIYVKAGIYDEYVTVTQDMKNIFMYGDGPKKTIVTGRKSNRDGFTTQDTASFIAIGDGFLCKSMGFRNTAGPEGHQAVALRVQSDRSAFFNCRMDGYQDTLYVQTQRQFYRNCVI…
ClPMEI33	Cla97C05G107740.1	ATGGCTGAAAAGCATTTGGTTTCTTTCTCATTGGTCTTTCTCACCGTCGTTGTCTTCGCCGGCCAAGCTCACGGATCCGCCATCTGCGACAAAGCCGATTTCCCTGCACTCTGCCGGTCCTCCGTGAAAGGCGCCTCCGATCCAAAATCCGCCATAAAGGCCGCCATCGAACACCTCATTTTCGAAACAAATCACGCCAAAGATTCGAGCCAGAAGATCGGCCATTTGAAGTCTCTAAGCGTGTGTAAACAGAACTTCAACGACGCCCATGACGATCTGCGGAAAAGTCTGCAGTATTTGAAGAACCACGACATTCCGAGCCTGAAAATTAGCCTCTCTGGAGCATTGACTGACTACTCCACCTGCGACGATGCGGTGGTGGAGAGCGGTGACGAGAAG…	ATGGCTGAAAAGCATTTGGTTTCTTTCTCATTGGTCTTTCTCACCGTCGTTGTCTTCGCCGGCCAAGCTCACGGATCCGCCATCTGCGACAAAGCCGATTTCCCTGCACTCTGCCGGTCCTCCGTGAAAGGCGCCTCCGATCCAAAATCCGCCATAAAGGCCGCCATCGAACACCTCATTTTCGAAACAAATCACGCCAAAGATTCGAGCCAGAAGATCGGCCATTTGAAGTCTCTAAGCGTGTGTAAACAGAACTTCAACGACGCCCATGACGATCTGCGGAAAAGTCTGCAGTATTTGAAGAACCACGACATTCCGAGCCTGAAAATTAGCCTCTCTGGAGCATTGACTGACTACTCCACCTGCGACGATGCGGTGGTGGAGAGCGGTGACGAGAAG…	MGRHSTTFVVVLIVLLIPTEIFCYSEKEIKRWCSQTPYPAPCEEFLKTKALTNKSPIVNKSHFFEILVQTALERAVSAHKNALSLGPKCRNAKEKTAWTDCVDLYDQIITRLNRTADRCSPVDAQTWLSAALTALETCRTGFEELGVSAFGYSLTANNVSKLISDGLSVNKPPSPEGYEPQTMAEGFPTWVRPGDRKLLQAGSPKANVVVAKDGSGNFQTVKEAVAAAKGGGRFVIYVKAGVYSENVEIKAKNVMLIGDGIGKTVITGSRSVGGGSTTFRSATVAVDGDGFIARDITFRNTAGAKNHQAVALRSGSDLSVFYRCGFEGFQDTLYVYAERQFYKQCDIYGTVDFIFGNAAVVIQDSNIIARDPPNKTITLTAQGRTDPNQNTGISIHNCR…
ClPMEI34	Cla97C05G107750.1	ATGGCTGAAAAGCAATTGGTTTCTTTCTCACTGGTGTTTCTCGCCACCGTCTTGTTCGCCGGCCAAGCTCAGGGATCCGACATCTGCCAAGAAGCCCAATACGTGCCGCTCTGCCGATCCGTGGTGAAAGGCGCTTCCGATCCGACGGTCGCCATTAAAATAGCCATTGAAAATCTCTTGTTTGAAACAAAACGCGCTAAAGCAGGGAGCGTGAAGCTGGCCAATGCGCAGGCCATTAACGCTTGCAATCAGAACTACGACTCCGCCATTGACAGCCTTGAGAAGGGCTTGCAGTATTTGAAGAGCAAGGACAAGCAGAGCCTTCAGGTCATGCTTTCCGGGGCCTTATCTTTCTACGTTTCCTGCAGCGATGCGGTCGTGGAAGTCAGCAGCTTCGGC…	ATGGCTGAAAAGCAATTGGTTTCTTTCTCACTGGTGTTTCTCGCCACCGTCTTGTTCGCCGGCCAAGCTCAGGGATCCGACATCTGCCAAGAAGCCCAATACGTGCCGCTCTGCCGATCCGTGGTGAAAGGCGCTTCCGATCCGACGGTCGCCATTAAAATAGCCATTGAAAATCTCTTGTTTGAAACAAAACGCGCTAAAGCAGGGAGCGTGAAGCTGGCCAATGCGCAGGCCATTAACGCTTGCAATCAGAACTACGACTCCGCCATTGACAGCCTTGAGAAGGGCTTGCAGTATTTGAAGAGCAAGGACAAGCAGAGCCTTCAGGTCATGCTTTCCGGGGCCTTATCTTTCTACGTTTCCTGCAGCGATGCGGTCGTGGAAGTCAGCAGCTTCGGC…	MFGLKNRAQIPSNPTSISTISTFFFIFFLFSFKPISSNPQIHQTARSLCNGTLFPNLCFSKLSSFPQLASLSPQKLAGSALNFTAREVLDAYANCTKLKTHLYCGLNPTDRRALDDCLELLDGSIAELKASICDLAPPQSAARHSHDLLTLVSAAMTNHRTCVDGFYNSSGTVRRRVEQYLGKIGQHLSIDLAMLKKIPGVNRGAAAGEVLPEYGAVKGGFPKWVSVKDRRLLQAAVNETNFNLVVAKDGSGNFTTVGEAVAAAPNSSTTRFVIYIKAGAYFENVEIERAKANLMFIGDGIGKTLIKGDRNVVDGWTTFRSATVAVVGTGFIAKGITFENYAGPSKHQAVALRSNSDFSAFYQCSFVGYQDTLYVHSLRQFYRECDIYGTIDFIFGNAA…
ClPMEI35	Cla97C06G110100.1	ATGAAACCCAAATTCTCACTATCTCCTTTCATGATCACTCCTCTCCCTTCTCTTCTCCTTCTCTCCATCATCATCTTCAACATCTCTACCACAATTGTTGTTGCTGATCTTGTCCAAAAAACTTGCAAAAAATGCGAAAACAACGACCCGAACATCAACTACAACTTCTGCATTTCATCTTTCCATGCTCATCCAGGAAGCGATACGGCCGATCTTCGAAAACTCGGTGCCATTTCATTGAGTTTGATTCAAAAAAATGTTAGCAACTCATTTGAGTATGTGGAAAAGCTATTACAAAACAAAGAAATAGACTCATATAAAAAGCTTTGCTTAAATGATTGTTTAGAAGTCTATTCAAATGCCATTGATAGTATGGAAGAAGGAAAGAAAGCATACAAG…	ATGAAACCCAAATTCTCACTATCTCCTTTCATGATCACTCCTCTCCCTTCTCTTCTCCTTCTCTCCATCATCATCTTCAACATCTCTACCACAATTGTTGTTGCTGATCTTGTCCAAAAAACTTGCAAAAAATGCGAAAACAACGACCCGAACATCAACTACAACTTCTGCATTTCATCTTTCCATGCTCATCCAGGAAGCGATACGGCCGATCTTCGAAAACTCGGTGCCATTTCATTGAGTTTGATTCAAAAAAATGTTAGCAACTCATTTGAGTATGTGGAAAAGCTATTACAAAACAAAGAAATAGACTCATATAAAAAGCTTTGCTTAAATGATTGTTTAGAAGTCTATTCAAATGCCATTGATAGTATGGAAGAAGGAAAGAAAGCATACAAG…	MAISHYLCVFILSIFFFSNFLITQSSNNIKTSDLIHKTCKKISREDPNISFNFCLTSLEFATKHSRCTDVRRLGLLSIGLLHRNVTSTRHHIVKSMRNKKLDPFVKLCLDDCLELYSDAIPTVKQAMRDYRLKRYDDANIAISSVMDAATTCEDGFKEREGVASPLKKRDEDAFELGAITLSIMSLLR
ClPMEI36	Cla97C06G110110.1	ATGTTGATGTTCTTCTCCAATTTTCTCATCACTCAATCTTCCAACAACACATCTTCCCTCATATTCAAAACTTGCAAAACCAGCTCTGACCAAGACCCCAACATCTCCTTCAATTTCTGCCTAACATCTCTTCAACCCGCCGCGTCCAAGCACCACCACGGCGCCACCAGTCTCCGCCGCCTCGGCCTCATTACCATCTACTTGATTAGACACAACATGAGCAGCACACGCCACCATATCAAGAAGTTGCGAAGAAACAAAGGCCTCACCGACCCGTTGGTTAAGTCGTGTTTGGCTGATTGTTTGGAGCTTTATTCCGATGCGATCCCGACGGTGAAGCAAGCGGGGAAGGATTACAAGGCCGGTCGATACGCCGACGCAAACTCGAAGATCAGCTCG…	ATGTTGATGTTCTTCTCCAATTTTCTCATCACTCAATCTTCCAACAACACATCTTCCCTCATATTCAAAACTTGCAAAACCAGCTCTGACCAAGACCCCAACATCTCCTTCAATTTCTGCCTAACATCTCTTCAACCCGCCGCGTCCAAGCACCACCACGGCGCCACCAGTCTCCGCCGCCTCGGCCTCATTACCATCTACTTGATTAGACACAACATGAGCAGCACACGCCACCATATCAAGAAGTTGCGAAGAAACAAAGGCCTCACCGACCCGTTGGTTAAGTCGTGTTTGGCTGATTGTTTGGAGCTTTATTCCGATGCGATCCCGACGGTGAAGCAAGCGGGGAAGGATTACAAGGCCGGTCGATACGCCGACGCAAACTCGAAGATCAGCTCG…	MGNSNLLAFLTLVLFIVVSHAASNDVVSTICPKTTNPPFCSSVLRSAGTTDLKGLTVYALNLAHTNAAKSVALAKSLAATATNPQLKQRYSSCAGSYDEAVGDIEDAQKDLALGDFNAVNTATSGAMTEIDDCQDNFNQPPPDTSMLLKNGKTLNDICSIILVISNLL
ClPMEI37	Cla97C06G110120.1	ATGGCCATATCTCATTATCTCTGTGTTTTCATTCTCTCCATTTTCTTCTTCTCCAATTTCCTCATTACACAATCCTCCAACAACATCAAAACATCTGATCTAATCCACAAAACTTGCAAGAAAATCTCAAGAGAAGACCCTAACATTTCCTTCAACTTTTGCTTAACATCTCTAGAATTTGCCACCAAGCATAGCCGATGCACCGATGTTCGTCGCCTCGGCCTCCTCTCGATTGGGCTCCTACATAGGAATGTGACCAGCACCCGCCACCATATCGTAAAGTCGATGAGAAACAAGAAGCTTGACCCGTTTGTTAAGTTATGTTTGGATGATTGTTTGGAGCTTTATTCCGATGCGATCCCGACGGTGAAGCAGGCGATGAGGGATTATAGGTTGAAA…	ATGGCCATATCTCATTATCTCTGTGTTTTCATTCTCTCCATTTTCTTCTTCTCCAATTTCCTCATTACACAATCCTCCAACAACATCAAAACATCTGATCTAATCCACAAAACTTGCAAGAAAATCTCAAGAGAAGACCCTAACATTTCCTTCAACTTTTGCTTAACATCTCTAGAATTTGCCACCAAGCATAGCCGATGCACCGATGTTCGTCGCCTCGGCCTCCTCTCGATTGGGCTCCTACATAGGAATGTGACCAGCACCCGCCACCATATCGTAAAGTCGATGAGAAACAAGAAGCTTGACCCGTTTGTTAAGTTATGTTTGGATGATTGTTTGGAGCTTTATTCCGATGCGATCCCGACGGTGAAGCAGGCGATGAGGGATTATAGGTTGAAA…	MSCSQTPYPDLCFHYINSNNHASTAGIGETSLIVTDHFQNSAIRSTLNQAMIVHDHLRSAMVLDSFDDDDRTKFALIDCLELYEDSIAELNHSAISFMNINSIDHLTLLSASLANHQTCQDGFRDFGFSSDDLNNFFFPFQILSNFSKLVSNSLAITKAATAAAATSSSNSGGRRLLGGSFPKWVYNDDRMLLQGVVGNRADMVVAQDGSGNFRTISEAVAAAEEARKGSGRFVIYVKGGIYKENVVIKKRMKNIMMIGDGIDRTTVTAMKNVQDGSTTFRSATFAVAGEGFIAKDMTFENTAGPEKHQAVALRSNADRSLFYRCSFKGYQDTLYAHSNRQFYRECHIYGTVDFIFGDGIAVFQNCNIFVRKPMMHQKNTITAQARSDPNENTGFVIHN…
ClPMEI38	Cla97C06G114010.1	ATGGGGAACTCTAATCTCTTAGCTTTTCTTACACTTGTTTTGTTCATCGTGGTTTCACATGCAGCATCCAACGACGTCGTTTCCACCATTTGTCCGAAAACGACGAACCCACCATTTTGTTCGAGCGTGTTGAGATCTGCGGGGACTACGGATCTGAAAGGGTTGACCGTATACGCCCTCAACCTTGCCCATACAAATGCGGCTAAGTCTGTGGCCCTAGCCAAGTCATTGGCCGCCACAGCCACCAATCCTCAACTTAAACAACGATATTCGTCTTGTGCTGGGAGCTATGACGAAGCTGTTGGTGACATTGAGGATGCCCAGAAGGACTTGGCTCTCGGTGACTTTAACGCCGTTAATACTGCAACTTCTGGTGCTATGACGGAGATTGACGATTGT…	ATGGGGAACTCTAATCTCTTAGCTTTTCTTACACTTGTTTTGTTCATCGTGGTTTCACATGCAGCATCCAACGACGTCGTTTCCACCATTTGTCCGAAAACGACGAACCCACCATTTTGTTCGAGCGTGTTGAGATCTGCGGGGACTACGGATCTGAAAGGGTTGACCGTATACGCCCTCAACCTTGCCCATACAAATGCGGCTAAGTCTGTGGCCCTAGCCAAGTCATTGGCCGCCACAGCCACCAATCCTCAACTTAAACAACGATATTCGTCTTGTGCTGGGAGCTATGACGAAGCTGTTGGTGACATTGAGGATGCCCAGAAGGACTTGGCTCTCGGTGACTTTAACGCCGTTAATACTGCAACTTCTGGTGCTATGACGGAGATTGACGATTGT…	MISINQAMGNATEIGSEISDLLKGSSEKWGKYSLNCLKSCLEIYSEAVSDLEKALGALKMEDYGTANTGLSAAMDAPMSCEDGYKEKDGEVSPLTEINDGFFQLIAISLAFINMCK
ClPMEI39	Cla97C06G114020.1	ATGAGTAATTCCAATTCATATTTAAATCTTGAAGTCTTTAGCTGGGTTATGGTATTTCTTTTTGGTGTTCTTTTATCCAACGTCATTCCTACGATTGTTGGTACGACGCCATCAAACAATGTAGAATCGAGTATCTGTCCAAAAACTAGGAATCCATCATTTTGCGCAAGCGTGTTGAAATCTGGTGGCAGCACAGACCTAAAAGCACTAGCCACTTACACCCTAAACCTTGCTCTTACAAATGTTGGAAAATCTATGACCCTAGCCAAGTCACTTGCATCCACAACAACCAATTCTCAACTTAAGAAACTATATTTATCTTGCTCTGAGAATTACAATAATGCCATGGGCGACGTTGAAAATGCTCAAAACTATTTGGCCACGAGTGACTTTAATGGT…	ATGAGTAATTCCAATTCATATTTAAATCTTGAAGTCTTTAGCTGGGTTATGGTATTTCTTTTTGGTGTTCTTTTATCCAACGTCATTCCTACGATTGTTGGTACGACGCCATCAAACAATGTAGAATCGAGTATCTGTCCAAAAACTAGGAATCCATCATTTTGCGCAAGCGTGTTGAAATCTGGTGGCAGCACAGACCTAAAAGCACTAGCCACTTACACCCTAAACCTTGCTCTTACAAATGTTGGAAAATCTATGACCCTAGCCAAGTCACTTGCATCCACAACAACCAATTCTCAACTTAAGAAACTATATTTATCTTGCTCTGAGAATTACAATAATGCCATGGGCGACGTTGAAAATGCTCAAAACTATTTGGCCACGAGTGACTTTAATGGT…	MKLKPAIIFLSSFPMPSLLFLFFLPLHFSYAAHQTLRPEIAAACTATRFPDQCASSISQSNRLPQNPTPLQIIQAAVWLSSENLKTAKSMVKAILDSSKESPNRNRTAAALSCLEALGYSEYRISLSNDAIPLGRTKDARAWLSASLLYQTGCRSGLVYVNDTREVDQMMSFLDNLTVLSSNALSMAVAYDIFGNETAAWGPPRTERDGFWEGSSGTAVGTGMRIPAKTEANATVCKDGSEGCYTTVQAAVEAAPGNSAVRFVIHIKEGVYEESLRVGLEKKNLVFLGDGMGKTVITGSLNVGQPGISTYNSATVGVLGDGFMASGLTIQNTAGPNAHQAVAFRSDSDLSIIHNCEFIGNQDTLYAHSLRQFYNSCRILGNVDFIFGNSASIFLNCHIL…
ClPMEI40	Cla97C06G114030.1	ATGGCATCGACCATTTGCCCTAAAACTAGAAACTCATCTTTATGTTGGAGATTATTGAAACCCATGGGCAGCATGGACGGCCCTAAGTTGGCCAATTACACCCTCAGCCTCTCCCTTACGACTGCCGTTGAAGCTCTCCGCCATGCACGCCAACTCGAGGCAACAAACACAACCGATCCACAACTTAACAAACGATATTCGGAATGTTCACGTCGGTTCAACTCCGCCGTGGAGGGCTTAGAACAAGGCAAAGAAGCGTTGGCCACTGGTGGCTATGTTGTCCTTACATTTGCAAATATGGCTTCCCAGTCGGAGGCCGATGAATGTTTAGGTTACTTCAAACAGCCACCACCGGAACCATCATCGCTTCCGGAGAAGGCTAAGGACCTTGGAGATATT…	ATGGCATCGACCATTTGCCCTAAAACTAGAAACTCATCTTTATGTTGGAGATTATTGAAACCCATGGGCAGCATGGACGGCCCTAAGTTGGCCAATTACACCCTCAGCCTCTCCCTTACGACTGCCGTTGAAGCTCTCCGCCATGCACGCCAACTCGAGGCAACAAACACAACCGATCCACAACTTAACAAACGATATTCGGAATGTTCACGTCGGTTCAACTCCGCCGTGGAGGGCTTAGAACAAGGCAAAGAAGCGTTGGCCACTGGTGGCTATGTTGTCCTTACATTTGCAAATATGGCTTCCCAGTCGGAGGCCGATGAATGTTTAGGTTACTTCAAACAGCCACCACCGGAACCATCATCGCTTCCGGAGAAGGCTAAGGACCTTGGAGATATT…	MEKPIILAVSSLLPFVFSLLFSNAIISIHAASSNDAVSTICQRTRNHPFCSNLLKSAATTDLKALATFTLNLARTKATEGRALAQSLASKTANPKLKERYSSCAEHYDDAAGDIDDAKFYLAKGDYNGVNIQASGAMTEVDDCQENFTQPPVDRTGVSKNAKALEDICSIILVIANLLLGRV
ClPMEI41	Cla97C06G114040.1	ATGGCGTCTTCCTTAAGCGAAATGAAGCCTTTATTTCTTGCCCATCAGAATCAGATTTTAGCTGCAAGCTTGGAGCCGGAACGAGCACTTAACCGCTATACGGGATCTCCAAATGTCATTACAACCACAGTTTGCCCCAGAACTAGAAACTCTTCTTTATGTCGAACCGTCTTGAAACCCGCCGGAAAATCTGACGCCCTCCTCAAAGTGGCTAATTACACTCTTACCCTTGCCCATACCACCGCCGTCGAAGGTCTCCGCCACGCACAGCGGCTGGCGGCGGCGGCCACCAATCCATTGCTTAAACAACGCTATTCCGAATGCTCACGGCGGTTTGATTTTGTGGCGAAGGGTTTAGAAGAAGCCAAAGCCGCGTTGGTTAAAGGTGGGTATATTCCA…	ATGGCGTCTTCCTTAAGCGAAATGAAGCCTTTATTTCTTGCCCATCAGAATCAGATTTTAGCTGCAAGCTTGGAGCCGGAACGAGCACTTAACCGCTGTAGAAAGCTTTCAATTTCAATGCAAGGTGAGATTGTTAGATAACCATTTGATTTTTTACTTATAAATATTACTTTCATGAGTTTCTCTATTTTTTGTTATCTACTTCTAAACAAAGTTTTCAAAATATGTGTTTAAGTTTTAAAAACTCTAGAAAATAAGTAGGCATCATTTCATAAGTATGTGATTTTTTATTCTTTAACATTAAGTTTATATAAACATATTTCGTTTTGTTATCTATTTGTTGTTGCATATATTTTTAAAAAATTCAAATCTAAAATTTTTTAAACCTATTTGAAATTT…	MELINNVFLLLALSSLFTSAIAVCVPRNTFNFGSNSIPPVLSPQIAPQSLPVTVSPPQSTPSQAPSVTVSPPQSPPSQAPPATVSPPQSSTAPTNSAPAEEESGSEEHSGLPVFHKLHSDDFVSSVTSSVTTDLAEICDVTSNPQLCRTSIASHINGPTVDPTTALKTEIEQSIKEVSKAIATLNTLRKDSAASNAEIACYDTCLENFDMAIEDLKAGLESIDVHDNGRMESVLTAVLTDLMTCDDTFAEMGVDSPLDSLSAKMSKYASNCLAISKLLL
ClPMEI42	Cla97C06G114450.1	ATGTCAAACGGATTTGCCAATGGCGAAGGTGATAAAAAGAAGAAGAAAATCGCCATCGTTAGTGTCTCTTCTTTAATCCTGGTGGCAATGGTTGTCGCCGTCACCGTCGGCGTCAACAGTGCACCTCACGAAGAGCACAGCGACGATCACGGTGGCGAGACTCATGAGATTTCATCAACGACTAAAGCAATCCAAGCCATTTGTCAACCTACGGATTACAAAGAATCCTGCGAGAAGAGTCTAATGGCAGAAGCCGGTAATACAACAGACCCAAAAGAGCTAGTGAAAGTGGGATTCAAAATCGCCACGAGGAATCTAAACGAGGCGATAAGAAATTCCACCACGCTTCAAGAATTAGCCAAAGACCCAAGAACCAACCAAGCCCTTCAAAATTGTCGT…	ATGTCAAACGGATTTGCCAATGGCGAAGGTGATAAAAAGAAGAAGAAAATCGCCATCGTTAGTGTCTCTTCTTTAATCCTGGTGGCAATGGTTGTCGCCGTCACCGTCGGCGTCAACAGTGCACCTCACGAAGAGCACAGCGACGATCACGGTGGCGAGACTCATGAGATTTCATCAACGACTAAAGCAATCCAAGCCATTTGTCAACCTACGGATTACAAAGAATCCTGCGAGAAGAGTCTAATGGCAGAAGCCGGTAATACAACAGACCCAAAAGAGCTAGTGAAAGTGGGATTCAAAATCGCCACGAGGAATCTAAACGAGGCGATAAGAAATTCCACCACGCTTCAAGAATTAGCCAAAGACCCAAGAACCAACCAAGCCCTTCAAAATTGTCGT…	MNSVPFICLLLLSLLLAGASDSSPPSTALCKSTLYPKLCRSILSSIRFSPSDPYGYGKFSVKKCLKQAIKMSSVISDYLDRGRDSRLNQREAGALNDCRELSDLNVEFLRSIQGVLEAAEGVDEELVERVESILSAIVTNGQTCIDGLVESRSSLGNALSAPLASAGELYSVSLGLVSNSLSRRWKKRRQKGNGDGGNFPAGARSREPLNTLIKGLHKMGSCNNQSTKCSGRKRLLTDLGSTGILINNTVVVSSTGADNFTSIGDAIAFAPNNSMPQDGYFVIYVREGYYEEYVVIPKFKTNVMLIGDGINRTIITGNHSVVDGWTTYNSSTFTVCGDGFVAIDMTFRNTAGPEKHQAVAVRNSADLSTFYRCSFEGYQDTLYVHSLRQFYRECDIYGT…
ClPMEI43	Cla97C06G125610.1	ATGATGATTTCTACTTCCTTTCTCTTCTCATTCACTACTTTCCTTTTACTTATTTTTTCCTCCTCCCATGGTTTAAACACCCAAAATATTATTCAAGAAACATGCAAGAAATCGGCTGAGAGTAGCCCAAATATCAACTACAAATTTTGTGTTGCTTCTTTGGAATCTGACAGCCGTAGTCGCTCAGCAAATCTCCACAAACTTGGCCTCATTTCAATGGATTTATTGCGACACAACATAACAAGCACTCGACGAGAAATCAAGAAACTTTTGAGGAACAAAAAGTTGGAAAATTTTGTTAAGGGTTGTTTGAAGGATTGCTTAGAGCTTTATTCTGACGCTATTCCAACGTTGAAAGAGGTAAAAAGAGAATACAAAGAGAAGAATTATAGAGATGCA…	ATGATGATTTCTACTTCCTTTCTCTTCTCATTCACTACTTTCCTTTTACTTATTTTTTCCTCCTCCCATGGTTTAAACACCCAAAATATTATTCAAGAAACATGCAAGAAATCGGCTGAGAGTAGCCCAAATATCAACTACAAATTTTGTGTTGCTTCTTTGGAATCTGACAGCCGTAGTCGCTCAGCAAATCTCCACAAACTTGGCCTCATTTCAATGGATTTATTGCGACACAACATAACAAGCACTCGACGAGAAATCAAGAAACTTTTGAGGAACAAAAAGTTGGAAAATTTTGTTAAGGGTTGTTTGAAGGATTGCTTAGAGCTTTATTCTGACGCTATTCCAACGTTGAAAGAGGTAAAAAGAGAATACAAAGAGAAGAATTATAGAGATGCA…	MNCYQNLTSFIPALLLAAFFLTIVPSHGIPRENLVTICSKTSNLSLCQKILSNDSRTMSADLPMLSLISSNLTKKQANQNLDSFSKLSKNESDPEQKRSFERCVKYYREIQANIQKAHQFSQQKIFRDNGPLVASKRLVIRCSQAIRINSLHIEVMNKLMILCCDISISVNQCAAANGHIQVSNISCQVTMAFSAYSSQLPTLFLILLIVHPALGDPATQQRIDRICRQNEDYGFCNRTFNENLRGPADYVGLTLIANDQVLRNTTNTYQFIVELQASTTDPATGAALETCRIGCSQVRQAFMQAISYFNQRDYANMVEVERAAPRGEAFCRPPMPESPLVERKRELRILIAMAVVTGHILAT
ClPMEI44	Cla97C07G141120.1	ATGGCACAAACCGACGACTGCGCCGTCACCGGATTTTTGTTCTCCGGCAGCCCCATTTCCATTTCCAACATAAAAATCAAGCTGTTGGTGTTAGCCGTGTGGGCTGCGCTTGTCCTGACGGGCGTCTCCTCCGACGAGCACGTGAGAAGCACGTGCGCCATGACGCTTTACCCGGAGCTTTGCGAGACGACGATATCGAGCGGAGTGGGAAGTAAGAGTTCAAAAGAGGCAATCGAATCGTCGGTGAATATTACGATTGGCGCAGTGAAGGATAACTATAAAAGGATCAAGAAATTGGTTAAGACAGGAAAGAATCTGAGAAAGCGAGAGAAGATTGCTCTCAATGACTGTCTAGAAACAGGGGAGGAGACGCTGAGAGAGCTGTATGAGGTTGTTGAT…	ATGGCACAAACCGACGACTGCGCCGTCACCGGATTTTTGTTCTCCGGCAGCCCCATTTCCATTTCCAACATAAAAATCAAGCTGTTGGTGTTAGCCGTGTGGGCTGCGCTTGTCCTGACGGGCGTCTCCTCCGACGAGCACGTGAGAAGCACGTGCGCCATGACGCTTTACCCGGAGCTTTGCGAGACGACGATATCGAGCGGAGTGGGAAGTAAGAGTTCAAAAGAGGCAATCGAATCGTCGGTGAATATTACGATTGGCGCAGTGAAGGATAACTATAAAAGGATCAAGAAATTGGTTAAGACAGGAAAGAATCTGAGAAAGCGAGAGAAGATTGCTCTCAATGACTGTCTAGAAACAGGGGAGGAGACGCTGAGAGAGCTGTATGAGGTTGTTGAT…	MAGVLRSGEALSLNLNLSLDLCRSADYPALCRSVVKGRHNPSTAMESAIQQLMIETKQAMNVARRRKSSAMDVCIEVYDDAYANLETCLSSLKSQDKGTLNINLSAALTDYVTCDDAVAEVGLTSPVTRSNDLLRRMTSNCLYLSSLIRVH
ClPMEI45	Cla97C07G141130.1	ATGGATACCGTCAAGTCCTTCAAGGGCTACGGCAAGGTCGACGAGCTCGAACAGCAAGCTTTCCGCCAAAAGACTCGTCGCCGGCTAATCATACTCCTTCTTTCCATTCTTCTTCTAATTGCTCTCGTCATCGGCGCCGTCGTCGGAATTGTCATTCATAAACGAAACTCTTCTTCTTCATCGCCCACCAGCTCAGCTCCTCCCACCGAGCTCACTCCCGCTGCCTCACTCAAAACTCTCTGTAGTGTTACTCAGTATCCCAGTTCCTGTCAGTCCTCTCTCCAAAACTCCAACACTACCGATCCGGTATTTCTCTTCAAGCTTTCTCTCCGAGTTGCCACCGATTCCCTCTCGAAACTTTCCGATTATACCTCTACTCTCAATTCCAATACTGGAGAT…	ATGGATACCGTCAAGTCCTTCAAGGGCTACGGCAAGGTCGACGAGCTCGAACAGCAAGCTTTCCGCCAAAAGACTCGTCGCCGGCTAATCATACTCCTTCTTTCCATTCTTCTTCTAATTGCTCTCGTCATCGGCGCCGTCGTCGGAATTGTCATTCATAAACGAAACTCTTCTTCTTCATCGCCCACCAGCTCAGCTCCTCCCACCGAGCTCACTCCCGCTGCCTCACTCAAAACTCTCTGTAGTGTTACTCAGTATCCCAGTTCCTGTCAGTCCTCTCTCCAAAACTCCAACACTACCGATCCGGTATTTCTCTTCAAGCTTTCTCTCCGAGTTGCCACCGATTCCCTCTCGAAACTTTCCGATTATACCTCTACTCTCAATTCCAATACTGGAGAT…	MERAIIAETLTKELGQKCRNQKERAAWADCLELYQTTILHLNKTFSEQNCSDFDIQTWLSSALTNLDTCRAGFVDLGVKDYGVVFPFLANNNVTKLISNSLAMNNCSESDVGYKNNEGFPKWLRVGDRRLLQAAEPKADLVVAQDGSGNYKTVQAAVDAAAKRKGSGRFVIHIKRGVYKENVVIKVKNLMLVGDGLRYTIISGSRSVGGGSTTFNSATVAVTGERFIARGITFRNTAGPENHQAVALRSGSDLSVFFRCGFEGYQDTLYVHSQRQFYRECYIYGTVDFIFGNAAVVLQNCMIYARKPIPGQQCVVTAQGRTDPNQNTGISIHNSRVMAADDLKPVLSSVRTYLGRPWKEYSRTVYLQNFMDSLVNPAGWLEWSGNFALNTLYYGEFKNF…
ClPMEI46	Cla97C08G161540.1	ATGGCGGGTGTTCTTCGGAGCGGGGAGGCATTGTCCTTGAACCTCAACCTTTCCTTGGATCTATGCCGGAGCGCAGACTACCCAGCATTGTGTCGGTCGGTGGTGAAGGGCCGGCATAACCCATCAACCGCCATGGAATCCGCTATCCAGCAATTGATGATCGAGACGAAGCAGGCCATGAATGTGGCACGCCGCCGCAAGTCCTCCGCCATGGATGTGTGCATCGAGGTTTACGATGACGCGTATGCCAACCTGGAGACTTGCCTTTCAAGCCTGAAATCCCAAGACAAGGGAACCCTCAACATCAACCTCTCCGCAGCTTTGACCGATTACGTGACTTGCGACGATGCGGTGGCGGAGGTAGGGCTTACTTCTCCGGTAACCCGAAGCAACGACCTC…	ATGGCGGGTGTTCTTCGGAGCGGGGAGGCATTGTCCTTGAACCTCAACCTTTCCTTGGATCTATGCCGGAGCGCAGACTACCCAGCATTGTGTCGGTCGGTGGTGAAGGGCCGGCATAACCCATCAACCGCCATGGAATCCGCTATCCAGCAATTGATGATCGAGACGAAGCAGGCCATGAATGTGGCACGCCGCCGCAAGTCCTCCGCCATGGATGTGTGCATCGAGGTTTACGATGACGCGTATGCCAACCTGGAGACTTGCCTTTCAAGCCTGAAATCCCAAGACAAGGGAACCCTCAACATCAACCTCTCCGCAGCTTTGACCGATTACGTGACTTGCGACGATGCGGTGGCGGAGGTAGGGCTTACTTCTCCGGTAACCCGAAGCAACGACCTC…	MLPRKPPFPFPISKSTLLFLSMASLSFLSFLSLFFFFLSLSSSSAAARHRHHHLPTHFTNPPSTDDVILHACKATRFPDQCGSSLSHSSSLPPNPTPLQILQSAVALSSDGLATAQSMVNQILDSSAKNLNRTTAAKNCLEVLRNSDYRISLTNDALRRGRTKDARAWLSASLLYHYDCWSALKYANDTQLVDKTMAFLDSLIGLSSNALSMLVAYDISGNDTAAWTPPRTERDGFWEGGGGGSGLGFSGGFPSKVAADATVCKDGAGGCYKTVQEAVNAAPENAAARRFVIHIKEGVYEEIVRVPLEKKNVVFLGDGMGKTVITGSLNVGQPGISTYNTATVGVLGDGFMASGLTIQNTAGPDAHQAVAFRSDSDLSVIQDCEFLGNQDTLYAHSLRQ…
ClPMEI47	Cla97C09G163490.1	ATGAAAGAGACCGATATAATGGAAAAGCCCATCGCCGCCGGCCTCTCAAATTCCGGCAACCACCACCAAAAGCCCAAAAACAAATCAAAAAAGCTTCTAATTTTAGCCCTGTCTTCGACCCTGCTCCTGGTCGGCGCCGTCGTGGGGATCGTCGCCGGAGTGACGAAATCGGAAAACTCCGGGAAATCACACGCCATTGTGAAGAGCACGTGCAGCAGCACGCTTTACCCGGATCTGTGCTTTTCTGCAATTTCGAATAGTGAAGGGGCTATGTTGAAAGTTAGTAATCAAAAGGATGTGATTGAGGTGTCAATTAATATAACGGTGAAAGCTGTGGAAGATAATTACTTTAGAGTGAAGAAATTGTGTGGGTTGAAGAATATTAGCCATAGAGAGAAA…	ATGAAAGAGACCGATATAATGGAAAAGCCCATCGCCGCCGGCCTCTCAAATTCCGGCAACCACCACCAAAAGCCCAAAAACAAATCAAAAAAGCTTCTAATTTTAGCCCTGTCTTCGACCCTGCTCCTGGTCGGCGCCGTCGTGGGGATCGTCGCCGGAGTGACGAAATCGGAAAACTCCGGGAAATCACACGCCATTGTGAAGAGCACGTGCAGCAGCACGCTTTACCCGGATCTGTGCTTTTCTGCAATTTCGAATAGTGAAGGGGCTATGTTGAAAGTTAGTAATCAAAAGGATGTGATTGAGGTGTCAATTAATATAACGGTGAAAGCTGTGGAAGATAATTACTTTAGAGTGAAGAAATTGTGTGGGTTGAAGAATATTAGCCATAGAGAGAAA…	MATHQPLLLQPPKTPRSKTFPTILCLAALLCSAIFITNKFIKSNPSKNDLPFLHNICHKAYNPSSCIQMAASESPFPQEIKTTNGAHFLHSFLRKSIPKVINTIEKAIDLSQRINNPRGEAALADCVELMEISNGRLMDSVLALKNRTSRSIENAHTWLSSVLTNHITCWDEIENSVSRAAAMDLGLEELIMRGRNSLGMFVSIWGSEIGNLGELGKRENAYPSWLKKGDRTLLGVSGREMQANIVVAKDGSGNFKTVKEAVEAVPDKSKNRVVIYVKKGIYKENVEVGKKKKNVMIVGDGMDSTIITGSLNVVDGSTTFNSATVAAVGDGFIAQDIWFQNTAGPEKHQAVALRVGADQSVINRCRIDAYQDTLYAHSNRQFYRDSTITGTVDFIFGNA…
ClPMEI48	Cla97C09G168010.1	ATGGCTGCCAGAACAACCACCGCCGCCGCCTTCTACTTTCTCATCCTCATTTCCCTTTACATTTCCACTTCCGCCGCCCCCACCGGTTCAGTATGCAGCTCGACTCGAGACCCATCCTACTGCAAATCGGTTCTCCCGAATCAAACCGGCAATGTCTACTCGTACGGACGGTCGTCGTTCAGAAAGTCACTGTCGTCGTCGCAGAAATTCCTCCGGCTGGTGGAGAAATACCTCAGGTCCCGATCGTCGCTGACAGTGCCGGCGGTGAGGGCGCTGGAGGACTGCCAGCTGCTGGCGGGACTGAACATTGATTACTTAACGACGTCGTTCCGGGCGGTGAACTCGACGAGCAGAACGTTGCCGGAGATGAAGGCGGACGACGTGCAGAGTCTGCTGAGT…	ATGGCTGCCAGAACAACCACCGCCGCCGCCTTCTACTTTCTCATCCTCATTTCCCTTTACATTTCCACTTCCGCCGCCCCCACCGGTTCAGTATGCAGCTCGACTCGAGACCCATCCTACTGCAAATCGGTTCTCCCGAATCAAACCGGCAATGTCTACTCGTACGGACGGTCGTCGTTCAGAAAGTCACTGTCGTCGTCGCAGAAATTCCTCCGGCTGGTGGAGAAATACCTCAGGTCCCGATCGTCGCTGACAGTGCCGGCGGTGAGGGCGCTGGAGGACTGCCAGCTGCTGGCGGGACTGAACATTGATTACTTAACGACGTCGTTCCGGGCGGTGAACTCGACGAGCAGAACGTTGCCGGAGATGAAGGCGGACGACGTGCAGAGTCTGCTGAGT…	MSNSNSYLNLEVFSWVMVFLFGVLLSNVIPTIVGTTPSNNVESSICPKTRNPSFCASVLKSGGSTDLKALATYTLNLALTNVGKSMTLAKSLASTTTNSQLKKLYLSCSENYNNAMGDVENAQNYLATSDFNGVNLATSGVMTAVDDCQDSFEQPLIDTSLLSENGKTLIDICSIILVISNLLPGPI
ClPMEI49	Cla97C09G168020.1	ATGTTTGGCCTCAAAAACAGAGCTCAAATCCCTTCAAATCCCACCTCCATTTCCACCATTTCTACATTCTTCTTCATTTTCTTCCTCTTCTCCTTCAAACCCATTTCTTCAAATCCCCAAATCCACCAAACCGCTCGATCCCTTTGCAATGGCACTCTGTTTCCAAACCTCTGTTTCTCAAAGCTCTCTTCTTTTCCCCAATTGGCTTCCCTCTCGCCGCAAAAGCTCGCCGGCAGCGCCCTCAACTTCACTGCCCGCGAGGTCCTCGATGCCTACGCCAATTGCACCAAGCTCAAGACTCACCTTTACTGTGGCCTGAATCCCACCGACCGTCGGGCCCTCGATGACTGTCTTGAGCTTCTCGACGGCAGCATTGCCGAGCTCAAAGCTTCGATCTGC…	ATGTTTGGCCTCAAAAACAGAGCTCAAATCCCTTCAAATCCCACCTCCATTTCCACCATTTCTACATTCTTCTTCATTTTCTTCCTCTTCTCCTTCAAACCCATTTCTTCAAATCCCCAAATCCACCAAACCGCTCGATCCCTTTGCAATGGCACTCTGTTTCCAAACCTCTGTTTCTCAAAGCTCTCTTCTTTTCCCCAATTGGCTTCCCTCTCGCCGCAAAAGCTCGCCGGCAGCGCCCTCAACTTCACTGCCCGCGAGGTCCTCGATGCCTACGCCAATTGCACCAAGCTCAAGACTCACCTTTACTGTGGCCTGAATCCCACCGACCGTCGGGCCCTCGATGACTGTCTTGAGCTTCTCGACGGCAGCATTGCCGAGCTCAAAGCTTCGATCTGC…	MAARTTTAAAFYFLILISLYISTSAAPTGSVCSSTRDPSYCKSVLPNQTGNVYSYGRSSFRKSLSSSQKFLRLVEKYLRSRSSLTVPAVRALEDCQLLAGLNIDYLTTSFRAVNSTSRTLPEMKADDVQSLLSAILTNQQTCLDGIKATAGSWSLKNGLSLPLAADTKLYSLSLAFFTKGWVPKKKKKPTWKAAGRQGGFRNGRMSLKMSSRTKAIYETATRRNLLQIDDGGDDQIAVRDIVVVSQDGSGNFTTINEAIAAAPNNSAPSDGYFLIFVSAGIYEEYVSIAKNKRYLMMIGDGINQTVVTGNRSVVDGWTTFNSATFAVVGPGFVAVNMTFRNTAGAIKHQAVAVRNGADLSTFYLCSFEAYQDTLYTHSLRQFYRDCDIYGTVDFIFGNA…
ClPMEI50	Cla97C09G168370.1	ATGTTGCGTGGACCCAGTACAAGAGCATCAATCGCAACCATTTTTGCCCTCATCGCCATTCTCCCATGGCTGACCCACTGCGCTAAGACGAGCTATGTCCAAGAAGCCTGCAGCGTAACACGACACCAAGATCTCTGCATCCAATCGCTGTCACCATTTTCAAGCACTGCCAAGCGAAGCCCCACAAAATGGGCGCGAGCGGGGGTGTCGGTGACGATAACAGAGGCCAAAACCGTGGCACGATTCTTGGGGAGGTTGAAGAAAAACAAGCGGTTGAAGGGGAGAAACAGGGCCGCAGTTTCGGACTGTGTTGAGGTCTTTGAAGCCGCCATTGATGAGCTCCATCTGTCGCTTGGGGTTCTTAGAAGACTGAGTAGGAGTAATTTTGACGCTCAAATG…	ATGTTGCGTGGACCCAGTACAAGAGCATCAATCGCAACCATTTTTGCCCTCATCGCCATTCTCCCATGGCTGACCCACTGCGCTAAGACGAGCTATGTCCAAGAAGCCTGCAGCGTAACACGACACCAAGATCTCTGCATCCAATCGCTGTCACCATTTTCAAGCACTGCCAAGCGAAGCCCCACAAAATGGGCGCGAGCGGGGGTGTCGGTGACGATAACAGAGGCCAAAACCGTGGCACGATTCTTGGGGAGGTTGAAGAAAAACAAGCGGTTGAAGGGGAGAAACAGGGCCGCAGTTTCGGACTGTGTTGAGGTCTTTGAAGCCGCCATTGATGAGCTCCATCTGTCGCTTGGGGTTCTTAGAAGACTGAGTAGGAGTAATTTTGACGCTCAAATG…	MAEKHLVSFSLVFLTVVVFAGQAHGSAICDKADFPALCRSSVKGASDPKSAIKAAIEHLIFETNHAKDSSQKIGHLKSLSVCKQNFNDAHDDLRKSLQYLKNHDIPSLKISLSGALTDYSTCDDAVVESGDEKKASSVLSTDTILENMAGNCLYLATLLK
ClPMEI51	Cla97C09G171500.1	ATGGAAAACACTAAACTTTCATTACCTCTCTTTGCTGCTTTACTCCTCACAAATGCTATTGTTGTTTTAGCCAATTCCAATGAGAATAGTGACATGAATAATAACTCGAGTGTCATAGAAAACTCATGTGCCATTACTCTTTATCCTCAACTATGTCAATCAACAATATACTCCATCGTCGGAACATCCAACTTGTTGAGTTTGAAAGATATTGTTGAAGTGTCATTGAGTGTTGCTGTTGATGCAGCTAAGCATAACTACAAAAGCATCAACAAACTTTGGATGTCACTTAATGATGTTAGTAAACGAGACAAGATTGCGCTTCGTGATTGTGTGGAAACCACAGACAGGGCGATTTATGAACTTCACAAGGCCGTAGAGGATCTTCGTGAGTATCCC…	ATGGAAAACACTAAACTTTCATTACCTCTCTTTGCTGCTTTACTCCTCACAAATGCTATTGTTGTTTTAGCCAATTCCAATGAGAATAGTGACATGAATAATAACTCGAGTGTCATAGAAAACTCATGTGCCATTACTCTTTATCCTCAACTATGTCAATCAACAATATACTCCATCGTCGGAACATCCAACTTGTTGAGTTTGAAAGATATTGTTGAAGTGTCATTGAGTGTTGCTGTTGATGCAGCTAAGCATAACTACAAAAGCATCAACAAACTTTGGATGTCACTTAATGATGTTAGTAAACGAGACAAGATTGCGCTTCGTGATTGTGTGGAAACCACAGACAGGGCGATTTATGAACTTCACAAGGCCGTAGAGGATCTTCGTGAGTATCCC…	MAGRHLVSFSLVILAVAALTGQAHGSAICDKADFPALCRSTVKDASDPTSAMTAAIEHLIFETEHAKDSSQKIGNLKSLSVCKQNFDDALDDLQKSLQYLKNNDIPSLKISLSGALTDYSTCDDAVIENGDEKKASGVLNTDTLLRNLAGNCLYLATLLK
ClPMEI52	Cla97C09G171650.1	ATGGAAAAACCCATTATTCTTGCAGTTTCATCTCTTCTACCTTTCGTCTTTTCACTTCTCTTCTCCAATGCCATCATTTCTATACATGCAGCTTCTTCAAACGACGCTGTTTCTACCATATGTCAAAGAACTAGAAACCATCCTTTTTGCTCCAACCTCTTGAAATCAGCTGCCACCACAGACTTGAAAGCATTGGCCACTTTCACCCTCAACCTCGCCCGCACCAAGGCTACAGAAGGTCGTGCCCTCGCCCAGTCCTTGGCGTCGAAGACAGCTAATCCGAAGCTTAAGGAGCGCTACAGCTCTTGTGCCGAACACTACGATGACGCAGCTGGAGACATCGACGATGCGAAGTTCTACTTGGCCAAGGGTGACTACAATGGCGTTAACATTCAGGCT…	ATGGAAAAACCCATTATTCTTGCAGTTTCATCTCTTCTACCTTTCGTCTTTTCACTTCTCTTCTCCAATGCCATCATTTCTATACATGCAGCTTCTTCAAACGACGCTGTTTCTACCATATGTCAAAGAACTAGAAACCATCCTTTTTGCTCCAACCTCTTGAAATCAGCTGCCACCACAGACTTGAAAGCATTGGCCACTTTCACCCTCAACCTCGCCCGCACCAAGGCTACAGAAGGTCGTGCCCTCGCCCAGTCCTTGGCGTCGAAGACAGCTAATCCGAAGCTTAAGGAGCGCTACAGCTCTTGTGCCGAACACTACGATGACGCAGCTGGAGACATCGACGATGCGAAGTTCTACTTGGCCAAGGGTGACTACAATGGCGTTAACATTCAGGCT…	MAEKQLVSFSLVFLATVLFAGQAQGSDICQEAQYVPLCRSVVKGASDPTVAIKIAIENLLFETKRAKAGSVKLANAQAINACNQNYDSAIDSLEKGLQYLKSKDKQSLQVMLSGALSFYVSCSDAVVEVSSFGVVKMASTIMNTDTTLQHLASNCLHVASLLK
ClPMEI53	Cla97C09G175280.1	ATGATTTCAATCAACCAAGCAATGGGCAATGCCACAGAGATTGGGTCAGAGATTTCAGATCTTTTGAAAGGAAGTAGTGAGAAATGGGGGAAATATTCATTGAATTGTTTGAAGAGCTGTTTGGAGATTTATTCTGAGGCTGTTTCTGATTTGGAAAAAGCTTTGGGGGCTTTGAAAATGGAGGATTATGGGACAGCAAATACAGGGCTAAGTGCAGCCATGGATGCACCGATGAGTTGTGAAGATGGGTATAAGGAGAAAGATGGAGAAGTTTCTCCTTTGACAGAGATCAATGATGGGTTCTTTCAGTTGATTGCAATTTCTCTTGCTTTTATCAATATGTGTAAGTAA	ATGATTTCAATCAACCAAGCAATGGGCAATGCCACAGAGATTGGGTCAGAGATTTCAGATCTTTTGAAAGGAAGTAGTGAGAAATGGGGGAAATATTCATTGAATTGTTTGAAGAGCTGTTTGGAGATTTATTCTGAGGCTGTTTCTGATTTGGAAAAAGCTTTGGGGGCTTTGAAAATGGAGGATTATGGGACAGCAAATACAGGGCTAAGTGCAGCCATGGATGCACCGATGAGTTGTGAAGATGGGTATAAGGAGAAAGATGGAGAAGTTTCTCCTTTGACAGAGATCAATGATGGGTTCTTTCAGTTGATTGCAATTTCTCTTGCTTTTATCAATATGTGTAAGTAA	MAKLTAKRLLQFWCFFILLFPMLSATSPPDLVKIECLTVPASQFSNSILSTIDVVQQVIAIFSPFTKLLGDLRLSTAVSDCLDLLDSSADQLSWSLSATQNPKAKDHSTGDLSSDLKTWLSAAVVNPETCMDGFEGTNSIIKGLVSGSINQLTSQLYELLSMVKSIPNQPAADFPSWVKSEDRNLLQLNDFAADATVAADGTGDFTSVMDAVLAAPDNSIQRYVIYIKRGVYFENVEIKKKKWNLMMIGDGIDATTISGNRSFIDGWTTFRSATFAVSGRGFIARDITFENTAGPQKHQAVALRSDSDLSVFFRCRIRGYQDTLYTHTMRQFYRECQISGTVDFLFGDATVVFQNCSILAKKGLPNQKNTITAQGRKDPNQPTGFSIQFCNISADSDLK…
ClPMEI54	Cla97C10G184580.1	ATGGCCAAATTAACCGCAAAACGCCTTCTTCAGTTTTGGTGCTTCTTCATCCTCTTGTTTCCCATGCTTTCGGCTACTTCTCCACCGGATCTTGTGAAGATAGAGTGTTTGACTGTACCCGCCTCCCAATTTTCTAACTCAATCCTCTCCACCATCGATGTTGTACAACAGGTTATCGCCATTTTCTCTCCATTCACTAAATTACTCGGTGATTTACGCCTTTCCACCGCCGTTTCCGACTGTCTCGATTTGCTTGACTCTTCTGCTGACCAGTTGAGCTGGTCCCTCTCCGCCACCCAAAATCCCAAGGCTAAAGACCACAGCACCGGAGATTTGAGTTCCGATCTGAAGACATGGCTGAGCGCTGCAGTGGTTAATCCAGAAACATGCATGGATGGA…	ATGGCCAAATTAACCGCAAAACGCCTTCTTCAGTTTTGGTGCTTCTTCATCCTCTTGTTTCCCATGCTTTCGGCTACTTCTCCACCGGATCTTGTGAAGATAGAGTGTTTGACTGTACCCGCCTCCCAATTTTCTAACTCAATCCTCTCCACCATCGATGTTGTACAACAGGTTATCGCCATTTTCTCTCCATTCACTAAATTACTCGGTGATTTACGCCTTTCCACCGCCGTTTCCGACTGTCTCGATTTGCTTGACTCTTCTGCTGACCAGTTGAGCTGGTCCCTCTCCGCCACCCAAAATCCCAAGGGTACTTCCTAAATTTGTATATTACTTGCTGCTTTTAAACCTTGCTTTATTATACTGGTTGGTGCATGGCCTTGGAATGCATTCAATTTG…	MASSTCFLSSQLWLTLFVVFVVSRSTMAADSETEDKINTLCRQMEEFGFCSQTFHENLKGASTDYIGLTKIANNRAIINATNTLGYIEELLKSESDPAMKNDLTVCENAYKIVNEAFGEGMKLFSQGDYKGMLNSERITPRAQASCDEIFSTPPAKQSPLVERNREMRILIAMAIVSASSIPS
ClPMEI55	Cla97C10G187580.1	ATGGAATCCTCATATCTTCCCCTTCCCCTTCCAATCACAGCCATTCTCCTCATAATCCTAATCAACCAACCAAATATTGCAAAATCTCAACCAGTAAATGACACCCAATTCATCAAATCCACTTGTCAATCCACACCCTACCCTGACCTCTGCCTCTCCTCGCTCTCCGCCGATGCCACCGCCATTCACGGTAGCCATCGTTTGATGACCATTGCCGCCCTCACGGTCGCCCTCACACACACGCGCTCTGCCTCATCAGCGGTTGAGAGGCTGGCCAAGTCGAGTGGTTTAACACCGCGAGAGAGCTATGTTCTGCGTGATTGCATAGAGGAGTTTGGAGACTCTATTGAAGAACTAAAGATGGCTGTGGCGGAGTTGAAAGATAATGACAAGACTCGA…	ATGGAATCCTCATATCTTCCCCTTCCCCTTCCAATCACAGCCATTCTCCTCATAATCCTAATCAACCAACCAAATATTGCAAAATCTCAACCAGTAAATGACACCCAATTCATCAAATCCACTTGTCAATCCACACCCTACCCTGACCTCTGCCTCTCCTCGCTCTCCGCCGATGCCACCGCCATTCACGGTAGCCATCGTTTGATGACCATTGCCGCCCTCACGGTCGCCCTCACACACACGCGCTCTGCCTCATCAGCGGTTGAGAGGCTGGCCAAGTCGAGTGGTTTAACACCGCGAGAGAGCTATGTTCTGCGTGATTGCATAGAGGAGTTTGGAGACTCTATTGAAGAACTAAAGATGGCTGTGGCGGAGTTGAAAGATAATGACAAGACTCGA…	MASSNPISLLTFLTFLFLLSSSSSAVVPTAEICQSTASPSFCNSFLPNSAASVHSHCRFTLRNALDHAHAFLALVDSHLSLFPSLSALHDCRGLAEANLDFISQTFSIVNSTAMVLPYYQAHEMVSLMSAMITNEDTCYDGLTGLGSALGLVDKVLEAISFDRKLYSLYLSLFKMGWVSEDMKAPMLPNMNHFGVGKGQLKLKMSPKDRAYYERLVHRKKPAAARRLLQTNYQDDGILINGMVAVDQNGAYDFTTISDAIAAAPNKSAVADGYFLIFVTAGIYNESVLVPKYKRYVLMMGEGNNQTIITGNKNVIDGSTTFNSATVAVEGIGFFGVNLTISNTAGAAKHQAVALRVSADNVTLYSCIFEGYQDTLYTHSLRQFYRECDIYGTVDFIFGN…
ClPMEI56	Cla97C10G190170.1	ATGGCTTCACATTACAAAATCTTATTCTTTTCCATAACCCTTTTCTCAATTCTTTCAAATATCTCTGGTAATAATACCATTAACAAATGGTGCAAAACCACGCCACATCCAAAAGTTTGCATTTCCTTCATGTCCCCAATCAAACCTCCACCACTAAACCGACCGGAGTTTCGAACAATGGCCATTAGAACCGCTTTCGAAAAAGCCGTCGAGGCTCAAAATTATGCAACCCGGTTTGGTCCGAGCTGTAAAACCACGCGCCAGAGAGCCGCGTGGACTGACTGTTTGAAGCTCTACAACGACGTCGTTTTCCAATTAAACCGTACCCTCCAATGCGTTCTTAGCGACGGAACAATCCAACGCCGCCGTTGTACGGATTTCGATGCGCAAACGTGGCTT…	ATGGCTTCACATTACAAAATCTTATTCTTTTCCATAACCCTTTTCTCAATTCTTTCAAATATCTCTGGTAATAATACCATTAACAAATGGTGCAAAACCACGCCACATCCAAAAGTTTGCATTTCCTTCATGTCCCCAATCAAACCTCCACCACTAAACCGACCGGAGTTTCGAACAATGGCCATTAGAACCGCTTTCGAAAAAGCCGTCGAGGCTCAAAATTATGCAACCCGGTTTGGTCCGAGCTGTAAAACCACGCGCCAGAGAGCCGCGTGGACTGACTGTTTGAAGCTCTACAACGACGTCGTTTTCCAATTAAACCGTACCCTCCAATGCGTTCTTAGCGACGGAACAATCCAACGCCGCCGTTGTACGGATTTCGATGCGCAAACGTGGCTT…	MACGNVYDSGRFSIRHSLSKASRFFDLIEKHLQNTSTLPKSITGALTDCQYLAQLNINFLSNSFRAVNGTDKKLTYSKADYIQSLLSAILTNIDTCLDGLNTVASGSSLEKDLLAPLIDCTKSYSLSLDLFTKGWVPRRNRNRTLGKKHQQFRKGPVPLRIMSRRDREVYNSVVNRRKLSSSSDDGVLVSGIVVVSQDGKGDFLNITEAINAAPNKALAANGYFLIYIMAGVYQEYVSIPSKKKYLLMIGDGINQTIITGNRSVADGWTTFNSATFAVAAEGFMAVNITFQNTAGPIKGQAVALRSGADMCVFYSCSFEGYQDTLYTHSLRQFFRECDIYGTVDFIFGNAAVVFQNCNIYPRLPHPGQTNMITAQGRSDLNQNTGTSIHNCTIRSASDL…
ClPMEI57	Cla97C10G193990.1	ATGATCGAGCATATGTGTGCTCAAACTGACTACAAAGACCTTTGCATCACCTCGCTGACTTCCGACCCCAATAGCTTCCCCGCCGACAAGCTGGGGCTAGCCTTGGTTGCCCTCCGCCTCGCCTCTTCCAATGCCTCTGACATATCAGAGAGTATCAAGGTGATGTTCAACGACACGAGCTTAAACGAGCCCGCAGTACAACAGGGCCTCTTTGATTGCCTTGATGCGTATCTGAATGCATCGCAACAACTTGACGACTCCATTGGTGCAATTATAGCGAAGTCCTATGGCGACGTCCAGAAATGGGTCAATGCGGCGATTGCTGATGCGCGCACGTGCGAGGCTTCGTTCGGAACGAAGCCGACAGTGTTGACGCCGAAGAATGAAGTGTTTATTAAG…	ATGATCGAGCATATGTGTGCTCAAACTGACTACAAAGACCTTTGCATCACCTCGCTGACTTCCGACCCCAATAGCTTCCCCGCCGACAAGCTGGGGCTAGCCTTGGTTGCCCTCCGCCTCGCCTCTTCCAATGCCTCTGACATATCAGAGAGTATCAAGGTGATGTTCAACGACACGAGCTTAAACGAGCCCGCAGTACAACAGGGCCTCTTTGATTGCCTTGATGCGTATCTGAATGCATCGCAACAACTTGACGACTCCATTGGTGCAATTATAGCGAAGTCCTATGGCGACGTCCAGAAATGGGTCAATGCGGCGATTGCTGATGCGCGCACGTGCGAGGCTTCGTTCGGAACGAAGCCGACAGTGTTGACGCCGAAGAATGAAGTGTTTATTAAG…	MASTICPKTRNSSLCWRLLKPMGSMDGPKLANYTLSLSLTTAVEALRHARQLEATNTTDPQLNKRYSECSRRFNSAVEGLEQGKEALATGGYVVLTFANMASQSEADECLGYFKQPPPEPSSLPEKAKDLGDISDIAAWVSSILAGDDYGT
ClPMEI58	Cla97C10G194330.1	ATGGAGCTCATCAATAATGTCTTCCTCCTCCTCGCCCTCTCTTCTCTTTTCACCTCTGCCATTGCCGTTTGCGTCCCTCGCAATACCTTTAACTTCGGATCGAATTCTATTCCACCAGTCTTGTCGCCGCAAATAGCCCCACAGTCACTGCCAGTTACGGTGTCGCCGCCACAATCTACCCCATCACAGGCACCGTCGGTTACGGTTTCTCCGCCACAATCTCCCCCATCACAGGCACCGCCGGCTACGGTTTCTCCACCACAATCTTCCACAGCACCGACGAATTCCGCTCCGGCGGAGGAGGAATCCGGCTCTGAAGAACACTCAGGACTACCTGTATTTCACAAATTACATTCGGATGATTTCGTATCGTCGGTCACATCGAGTGTGACGACGGAT…	ATGGAGCTCATCAATAATGTCTTCCTCCTCCTCGCCCTCTCTTCTCTTTTCACCTCTGCCATTGCCGTTTGCGTCCCTCGCAATACCTTTAACTTCGGATCGAATTCTATTCCACCAGTCTTGTCGCCGCAAATAGCCCCACAGTCACTGCCAGTTACGGTGTCGCCGCCACAATCTACCCCATCACAGGCACCGTCGGTTACGGTTTCTCCGCCACAATCTCCCCCATCACAGGCACCGCCGGCTACGGTTTCTCCACCACAATCTTCCACAGCACCGACGAATTCCGCTCCGGCGGAGGAGGAATCCGGCTCTGAAGAACACTCAGGACTACCTGTATTTCACAAATTACATTCGGATGATTTCGTATCGTCGGTCACATCGAGTGTGACGACGGAT…	MPFPVATFLLLFLPLVVVASSISSLPELDPVRFAQTGVAEARTEIGKLKRRRFGLGDCSTLYEEADWRLAGMLVGENYTAEDARAWLSAAVANHRSCLDGLEEVGAATAVEYGNNLTVMLTGALHLYDKIAAVEKRKGREVVKKQKWRENRGMDLAKWNPVTSKADYVVAKDGSGTHTTINGAVATLARTGRRRRGERIVIYVKAGVYKENVEIGIQLKNVMVVGDGADKTIVTGSRNVPDGATTYNSATFGVSGDGFWARDITFENTAGPEKQQAVALRLNSDLAVVYRCAIKGYQDTLFLHSLRQFYRDCQIYGTIDFIFGNSAAVLQNCEIFVRRPIRHQANMITAQGRDDPAEPTGISILNSRVQPAPDFAPVKAQYRTYLGRPWKRFSRTVVMA…
ClPMEI59	Cla97C11G206510.1	ATGGTGTTCCAAGATTTCGACCAAATCTCTGAACGCCGACGCGCCGAGAGGGCACGTAAGTTTCGAAAACGAGTCACTATCGCTGTGGTCTCGGCCTCTGTGATCCTCCTCCTCGTTGCTGCCGCTGTGTTCGTCCAGGTCTCCTCCTCCTCCAAGTCCACCACCAAAAATGGCGATAGCAAGAGTAGTGGCAACTCTAAACAACCCGTGCCACCCGACACGAAACAAGTGTCGCGCATCGAGAAAATGATTACCATGATATGCAACTCGACAGACTACAAAGGCAAATGCGAGAGCACTCTAAAAGATGGCGTCCACACGGATCCTGATTCCTCGGACCCGAAAGACCTCATCAAGCTGGCAATCTCGGCTGCGGCGGATGAGGTCAAATCTGCAGTG…	ATGGTGTTCCAAGATTTCGACCAAATCTCTGAACGCCGACGCGCCGAGAGGGCACGTAAGTTTCGAAAACGAGTCACTATCGCTGTGGTCTCGGCCTCTGTGATCCTCCTCCTCGTTGCTGCCGCTGTGTTCGTCCAGGTCTCCTCCTCCTCCAAGTCCACCACCAAAAATGGCGATAGCAAGAGTAGTGGCAACTCTAAACAACCCGTGCCACCCGACACGAAACAAGTGTCGCGCATCGAGAAAATGATTACCATGATATGCAACTCGACAGACTACAAAGGCAAATGCGAGAGCACTCTAAAAGATGGCGTCCACACGGATCCTGATTCCTCGGACCCGAAAGACCTCATCAAGCTGGCAATCTCGGCTGCGGCGGATGAGGTCAAATCTGCAGTG…	MASSLSEMKPLFLAHQNQILAASLEPERALNRYTGSPNVITTTVCPRTRNSSLCRTVLKPAGKSDALLKVANYTLTLAHTTAVEGLRHAQRLAAAATNPLLKQRYSECSRRFDFVAKGLEEAKAALVKGGYIPLSHATGATVVEADRCVKTFKKPPREPSKLPEKAKKIGDICDIAVSVSNILAEDY
ClPMEI60	Cla97C11G220530.1	ATGGCTTGTGGTAATGTCTACGACTCTGGCCGGTTTTCGATCCGTCATTCTTTATCTAAAGCATCTAGATTCTTTGACTTGATTGAGAAGCATCTTCAAAACACTTCAACTCTACCAAAATCCATCACTGGAGCTCTTACAGATTGTCAGTATCTTGCTCAACTGAATATCAATTTCTTGTCGAATTCGTTTCGGGCCGTTAATGGCACGGATAAAAAGCTAACTTACTCAAAAGCTGATTATATCCAAAGTCTTCTTAGTGCCATTTTAACCAACATTGATACCTGTCTTGATGGTCTAAACACTGTAGCCTCAGGTTCAAGTTTGGAGAAAGACTTGTTAGCCCCACTTATTGATTGTACCAAATCATACAGTCTTTCACTTGATCTTTTTACAAAG…	ATGGCTTGTAAGTTCCTGTTTCCTCTCTTACTAGCTTCATTTCTTATACTTTTAACCCTTTTCACCTCTTCATTTGCTGCAAATGATTCTCTCACTAATTTTTTCCCTGCAAAATCCATTTGCAAATTCACCTCAAATCCTTCCTACTGCATCACTGTGCTTAAAAAATCCACAGGTGGTAATGTCTACGACTCTGGCCGGTTTTCGATCCGTCATTCTTTATCTAAAGCATCTAGATTCTTTGACTTGATTGAGAAGCATCTTCAAAACACTTCAACTCTACCAAAATCCATCACTGGAGCTCTTACAGATTGTCAGTATCTTGCTCAACTGAATATCAATTTCTTGTCGAATTCGTTTCGGGCCGTTAATGGCACGGATAAAAAGCTAACTTACTCA…	MCSSPSFLVAFTLHFLSIFNPFLLAHANQNTNATVNNFAHGICNRLIQYNDLYKVCIPEIDSDPREDLKSDLTGLLIIFVNHSISNFNDNIVFLKKEINSGKVNGDTKDIMSMCLENFETGISALQESLHILLTQTGIDVYQLSMINVENYVSECVEDFEGNPIPNPPEWQSRYNSSWNLLGLILVMSNLIKCNRVISCIP

## Sheet: Table S2
watermelon				Arabidopsis
Chromosome	Gene_ID	Rename	Chromosome	Gene_ID	Gene Name
Cla97Chr01	Cla97C01G006690.1	ClPMEI5	1	AT1G23200.1
Cla97Chr01	Cla97C01G006700.1	ClPMEI6	1	transcript:AT1G23205.1	AtPMEI8
Cla97Chr01	Cla97C01G003880.1	ClPMEI2	1	transcript:AT1G62760.1	AtPMEI21
Cla97Chr01	Cla97C01G021790.1	ClPMEI10	1	transcript:AT1G11580.2
Cla97Chr01	Cla97C01G006700.1	ClPMEI6	1	transcript:AT1G14890.1	AtPMEI7
Cla97Chr01	Cla97C01G006700.1	ClPMEI6	1	transcript:AT1G70720.2	AtPMEI24
Cla97Chr01	Cla97C01G006700.1	ClPMEI6	2	transcript:AT2G01610.1	AtPMEI25
Cla97Chr01	Cla97C01G000480.1	ClPMEI1	3	transcript:AT3G49220.2
Cla97Chr01	Cla97C01G007550.1	ClPMEI8	3	transcript:AT3G62180.2	AtPMEI48
Cla97Chr01	Cla97C01G003880.1	ClPMEI2	4	transcript:AT4G12390.1	AtPMEI54
Cla97Chr01	Cla97C01G003880.1	ClPMEI2	4	transcript:AT4G25250.1	AtPMEI57
Cla97Chr01	Cla97C01G003880.1	ClPMEI2	5	transcript:AT5G51520.1	AtPMEI74
Cla97Chr02	Cla97C02G040540.1	ClPMEI14	1	transcript:AT1G09360.1	AtPMEI2
Cla97Chr02	Cla97C02G026840.1	ClPMEI11	5	transcript:AT5G09760.2
Cla97Chr02	Cla97C02G026840.1	ClPMEI11	5	transcript:AT5G64640.1
Cla97Chr03	Cla97C03G065030.1	ClPMEI18	5	transcript:AT5G20740.1	AtPMEI59
Cla97Chr05	Cla97C05G107730.1	ClPMEI32	1	transcript:AT1G70540.1	AtPMEI23
Cla97Chr05	Cla97C05G089170.1	ClPMEI28	1	transcript:AT1G62760.1	AtPMEI21
Cla97Chr05	Cla97C05G107730.1	ClPMEI32	1	transcript:AT1G23350.1	AtPMEI9
Cla97Chr05	Cla97C05G107730.1	ClPMEI32	1	transcript:AT1G10770.1	AtPMEI4
Cla97Chr05	Cla97C05G082930.1	ClPMEI23	2	transcript:AT2G45220.1
Cla97Chr05	Cla97C05G087810.1	ClPMEI26	3	transcript:AT3G05610.1
Cla97Chr05	Cla97C05G103840.1	ClPMEI31	3	transcript:AT3G10720.2
Cla97Chr05	Cla97C05G091180.1	ClPMEI30	3	transcript:AT3G49220.2
Cla97Chr05	Cla97C05G087810.1	ClPMEI26	3	transcript:AT3G06830.1
Cla97Chr05	Cla97C05G089170.1	ClPMEI28	4	transcript:AT4G25250.1	AtPMEI57
Cla97Chr05	Cla97C05G087810.1	ClPMEI26	4	transcript:AT4G15980.2
Cla97Chr05	Cla97C05G089170.1	ClPMEI28	4	transcript:AT4G12390.1	AtPMEI54
Cla97Chr05	Cla97C05G089160.1	ClPMEI27	5	transcript:AT5G51490.1
Cla97Chr05	Cla97C05G089170.1	ClPMEI28	5	transcript:AT5G51520.1	AtPMEI74
Cla97Chr05	Cla97C05G087810.1	ClPMEI26	5	transcript:AT5G49180.1
Cla97Chr05	Cla97C05G089170.1	ClPMEI28	5	transcript:AT5G62340.1	AtPMEI75
Cla97Chr05	Cla97C05G091180.1	ClPMEI30	5	transcript:AT5G53370.1
Cla97Chr06	Cla97C06G114450.1	ClPMEI42	3	transcript:AT3G06830.1
Cla97Chr06	Cla97C06G114450.1	ClPMEI42	3	transcript:AT3G05610.1
Cla97Chr06	Cla97C06G114010.1	ClPMEI38	3	transcript:AT3G05741.1	AtPMEI33
Cla97Chr06	Cla97C06G114450.1	ClPMEI42	4	transcript:AT4G15980.2
Cla97Chr06	Cla97C06G114450.1	ClPMEI42	5	transcript:AT5G49180.1
Cla97Chr07	Cla97C07G141120.1	ClPMEI44	1	transcript:AT1G53830.1
Cla97Chr07	Cla97C07G141130.1	ClPMEI45	1	transcript:AT1G53840.1
Cla97Chr07	Cla97C07G141130.1	ClPMEI45	3	transcript:AT3G14300.1
Cla97Chr07	Cla97C07G141120.1	ClPMEI44	3	transcript:AT3G14310.1
Cla97Chr08	Cla97C08G161540.1	ClPMEI46	1	transcript:AT1G23350.1	AtPMEI9
Cla97Chr08	Cla97C08G161540.1	ClPMEI46	1	transcript:AT1G70540.1	AtPMEI23
Cla97Chr09	Cla97C09G168010.1	ClPMEI48	1	transcript:AT1G02810.1
Cla97Chr09	Cla97C09G163490.1	ClPMEI47	1	transcript:AT1G53830.1
Cla97Chr09	Cla97C09G168370.1	ClPMEI50	2	transcript:AT2G47670.1	AtPMEI32
Cla97Chr09	Cla97C09G163490.1	ClPMEI47	3	transcript:AT3G14310.1
Cla97Chr09	Cla97C09G175280.1	ClPMEI53	5	transcript:AT5G46930.1	AtPMEI62
Cla97Chr10	Cla97C10G187580.1	ClPMEI55	1	transcript:AT1G62760.1	AtPMEI21
Cla97Chr10	Cla97C10G194330.1	ClPMEI58	1	transcript:AT1G02550.1	AtPMEI1
Cla97Chr10	Cla97C10G194330.1	ClPMEI58	2	transcript:AT2G47340.1	AtPMEI31
Cla97Chr10	Cla97C10G187580.1	ClPMEI55	4	transcript:AT4G12390.1	AtPMEI54

## Sheet: Table S3
Motif	Conserved motif sequence	Length/aa	Sequence Function	E-value
1	YGDLKTWLSAALTNQETCLDGFEEVG	26	pectin methylesterase inhibitor and related proteins	6.9e-13
2	ISSSTKAISTICSSTRYPSLCRSSLSSAAGTSSADP	36	pectin methylesterase inhibitor and related proteins	1.58e-05
3	KABVVVAKDGSGBFKTISEAVAAAPKKS	28	Pectinesterase	4.05e-11
4	IYVKAGVYEENVEIPKKKKNLMMIGD	26	Pectinesterase	3.27e-14
5	SRNVVDGSTTFNSATFAVVGDGFIARDMTFRNTAGP	36	Pectinesterase	6.42e-18
6	HQAVALRVGSDLSVFYRCSFEGYQDTLYVHSNRQFYRECDIYGTVDFIFG	50	Pectinesterase	1.13e-39
7	KPMPNQQNTVTAQGRTDPNQNTGISIQNCRIKAASD	36	Pectinesterase	1.09e-20
8	TYLGRPWKEYSRTVIMQSYJGDLIDPAGWLEWSGBF	36	Pectinesterase	2.97e-25
9	TLYYGEYQNRGPGANTSKRVKWPGYR	26	pectinesterase/pectinesterase inhibitor	1.77e-14
10	ASKFTVGNFIAGDSWLPSTGVPFTLG	26	pectinesterase/pectinesterase inhibitor	1.45e-08

## Sheet: Table S4
Table S4. Primers used for qPCR analyis in this study
Gene name	Primer name	Sequences (5’-3’)
ClPMEI1	ClPMEI1-F	CTAGCGACCTCGAAGCCTCCAA
	ClPMEI1-R	GAACCTTGCCACTCCAGCCAAC
ClPMEI3	ClPMEI3-F	TCCGATTGCGTGGAGGAGGTT
	ClPMEI3-R	TCTTCGTCGGTCAGAGCAGAGC
ClPMEI6	ClPMEI6-F	CGCTACGCCAACGCCATTCAA
	ClPMEI6-R	GCCATAGTCGCCGACGTGAGAT
ClPMEI11	ClPMEI11-F	CCTTGTCAACGGCACTGAGGAG
	ClPMEI11-R	GCATCCACCCAGACGACGAAAC
ClPMEI12	ClPMEI12-F	GCTCAAGTACGCCAACGACACT
	ClPMEI12-R	AAACCCATCCCGCTCAGTCCTC
ClPMEI18	ClPMEI18-F	CGCCGTCAACACATCACAGGA
	ClPMEI18-R	TGCCGGAGGACGCTCAAAGT
ClPMEI22	ClPMEI22-F	GTCAAAGACTCGGCGGCAGAAA
	ClPMEI22-R	CCATCTCCTCCACTCCGTCCAA
ClPMEI24	ClPMEI24-F	CCGCACCGATCCGAATCAGAAC
	ClPMEI24-R	TTACCGCTCCACTCCATCCACC
ClPMEI26	ClPMEI26-F	GACGACGGCTGTTGGAGGAATC
	ClPMEI26-R	CCACCACAACATCCGCCTTGAT
ClPMEI28	ClPMEI28-F	CGCCCTCACCGATGAAACCA
	ClPMEI28-R	CGCAATGTTGACGATCCTAGCC
ClPMEI30	ClPMEI30-F	CTCTCAACGCCAACGAACAGGA
	ClPMEI30-R	GTAAGCGGAGCGAACACGAAGA
ClPMEI34	ClPMEI34-F	TCCGCCATTGACAGCCTTGAGA
	ClPMEI34-R	GCCAGATGTTGCAGCGTCGTAT
ClPMEI36	ClPMEI36-F	GCAGCACACGCCACCATATCAA
	ClPMEI36-R	CGACCGGCCTTGTAATCCTTCC
ClPMEI44	ClPMEI44-F	GGAGACATGCGTGGACGGATTC
	ClPMEI44-R	TGGCAATGTCGGTGTCGGTTAG
ClPMEI45	ClPMEI45-F	AGGCAGCCACTTCCCAACCA
	ClPMEI45-R	GGAATGCTCCGATGTCCGACTG
ClPMEI47	ClPMEI47-F	TTGACCCGAAGGGATGGCATGA
	ClPMEI47-R	CTCCGTGGCACTCCGAATTACC
ClPMEI50	ClPMEI50-F	GCATCCAATCGCTGTCACCATT
	ClPMEI50-R	GCGGCTTCAAAGACCTCAACAC
ClPMEI51	ClPMEI51-F	AACACAGCAGGAGCAGCCAATG
	ClPMEI51-R	GCAACGACGCAGTTGACGAAGA
ClPMEI54	ClPMEI54-F	AAAGACCCAAACCAACCCACCG
	ClPMEI54-R	GCGTTCCACTCAAGCCAACCTT

## Sheet: Tbale S5
Gene name	Primer name	Sequences (5’-3’)
ClPMEI11	ClPMEI11-F	GAGGACAGCCCAAGCTACGCGTCTCGAGATGAAACTCAAACCCGCCAT
	ClPMEI11-R	ATCCCCCGGGCTGCAGGAATTCGATATCAGATGAAGGAATCCATTCAT
ClPMEI18	ClPMEI18-F	GAGGACAGCCCAAGCTACGCGTCTCGAGATGACTTTCCACTCTCTCCG
	ClPMEI18-R	ATCCCCCGGGCTGCAGGAATTCGATATCAGGAGCGGCCAACTTCTTCC
ClPMEI36	ClPMEI36-F	GAGGACAGCCCAAGCTACGCGTCTCGAGATGTTGATGTTCTTCTCCAA
	ClPMEI36-R	ATCCCCCGGGCTGCAGGAATTCGATATCAGCAAGCATATTGATAATGG
